# Supplementary material
Source: PubMed Central journal article supplement (PMC10171916)
Supplement: NIHMS1894736-supplement-Supplementary_Material.pdf [file NIHMS1894736-supplement-Supplementary_Material.pdf]

## Supporting Information

### **Near-infrared Rhodol Dyes Bearing Salicylaldehyde Moieties for Ratiometric pH Sensing in Live Cells During Mitophagy and Under Hypoxia Conditions**

Sushil K. Dwivedi,<sup>a</sup> Dilka Liyana Arachchige,<sup>a</sup> Tara Vohs,<sup>a</sup> Jiani Tang,<sup>b</sup> Kyle Usimaki,<sup>a</sup> Adenike Mary Olowolagba,<sup>a</sup> Delaney Raine Fritz,<sup>c</sup> Rudy L Luck<sup>a\*</sup>, Thomas Werner<sup>c</sup>, and Haiying Liu<sup>a\*</sup>

<sup>a</sup>Department of Chemistry, <sup>c</sup>Department of Biological Sciences, Michigan Technological University, Houghton, MI 49931. E-mail: rluck@mtu.edu, and hyliau@mtu.edu

<sup>b</sup>High School, Houghton Portage Township Schools, Houghton, MI 49931

## Table of Contents

|                                                                                                                                                    |            |
|----------------------------------------------------------------------------------------------------------------------------------------------------|------------|
| <b>Figure S1:</b> $^1\text{H}$ -NMR spectrum of compound <b>3</b> in $\text{CDCl}_3$ .....                                                         | <b>S8</b>  |
| <b>Figure S2:</b> $^1\text{H}$ -NMR spectrum of probe <b>A</b> in $\text{CDCl}_3$ .....                                                            | <b>S9</b>  |
| <b>Figure S3:</b> $^{13}\text{C}$ -NMR spectrum of probe <b>A</b> in $\text{CDCl}_3$ .....                                                         | <b>S9</b>  |
| <b>Figure S4:</b> LCMS spectrum of probe <b>A</b> .....                                                                                            | <b>S10</b> |
| <b>Figure S5:</b> $^1\text{H}$ NMR spectrum of compound <b>7</b> in $\text{CDCl}_3$ .....                                                          | <b>S11</b> |
| <b>Figure S6:</b> $^1\text{H}$ NMR spectrum of probe <b>B</b> in $\text{CDCl}_3$ .....                                                             | <b>S11</b> |
| <b>Figure S7:</b> $^{13}\text{C}$ NMR spectrum of probe <b>B</b> in $\text{CDCl}_3$ .....                                                          | <b>S12</b> |
| <b>Figure S8:</b> LC-MS spectrum of probe <b>B</b> .....                                                                                           | <b>S13</b> |
| <b>Figure S9:</b> Fluorescence spectra of probes <b>B</b> (10 $\mu\text{M}$ ) in different pH buffers containing 10% EtOH. ....                    | <b>S14</b> |
| <b>Figure S10:</b> Plot curve of fluorescence intensity of 10 $\mu\text{M}$ probes <b>AH<sup>+</sup></b> and <b>BH<sup>+</sup></b> versus pH ..... | <b>S14</b> |
| <b>Figure S11:</b> GaussView representation of probe <b>A</b> .....                                                                                | <b>S15</b> |
| <b>Figure S12:</b> Calculated UV-Vis spectrum for probe <b>A</b> in water.....                                                                     | <b>S17</b> |
| <b>Figure S13:</b> Drawings of selected molecular orbitals listed in Table S2.....                                                                 | <b>S18</b> |
| <b>Figure S14:</b> GaussView representation of probe <b>AH<sup>+</sup></b> .....                                                                   | <b>S19</b> |
| <b>Figure S15:</b> Calculated UV-Vis spectrum for probe <b>AH<sup>+</sup></b> in water .....                                                       | <b>S21</b> |
| <b>Figure S16:</b> Drawings of selected molecular orbitals listed in Table S4.....                                                                 | <b>S22</b> |
| <b>Figure S17:</b> GaussView representation of probe <b>B</b> .....                                                                                | <b>S23</b> |
| <b>Figure S18:</b> Calculated UV-Vis spectrum for probe <b>B</b> in water .....                                                                    | <b>S24</b> |
| <b>Figure S19:</b> Drawings of selected molecular orbitals listed in Table S6.....                                                                 | <b>S26</b> |
| <b>Figure S20:</b> GaussView representation of probe <b>BH<sup>+</sup></b> .....                                                                   | <b>S27</b> |
| <b>Figure S21:</b> Calculated UV-Vis spectrum for probe <b>BH<sup>+</sup></b> in water .....                                                       | <b>S28</b> |

|                                                                                                                                                                                                                                                                                                                                                                                                                                                                  |            |
|------------------------------------------------------------------------------------------------------------------------------------------------------------------------------------------------------------------------------------------------------------------------------------------------------------------------------------------------------------------------------------------------------------------------------------------------------------------|------------|
| <b>Figure S22:</b> Drawings of selected molecular orbitals listed in Table S8.....                                                                                                                                                                                                                                                                                                                                                                               | <b>S30</b> |
| <b>Figure S23:</b> Emission intensities of probe <b>A</b> (10 $\mu$ M) in the absence and presence of different cations (50 $\mu$ M) and anions (50 $\mu$ M) in pH 4.0 and 7.4 buffers under excitation at 465 nm .....                                                                                                                                                                                                                                          | <b>S30</b> |
| <b>Figure S24:</b> Emission intensities of probe <b>B</b> (10 $\mu$ M) in the absence and presence of different cations (50 $\mu$ M) and anions (50 $\mu$ M) in pH 4.0 and 7.4 buffers under excitation at 465 nm .....                                                                                                                                                                                                                                          | <b>S31</b> |
| <b>Figure S25:</b> Emission intensities of 10 $\mu$ M probes <b>A</b> (left) and <b>B</b> (right) in the absence and presence of different amino acids and reactive oxygen and nitrogen species (50 $\mu$ M) in pH 4.0, and 7.4 buffers under excitation at 465 nm .....                                                                                                                                                                                         | <b>S31</b> |
| <b>Figure S26:</b> Photostability of 10 $\mu$ M probes <b>A</b> (Left) and <b>B</b> (right) in pH 7.4 buffer under excitation at 465 nm.....                                                                                                                                                                                                                                                                                                                     | <b>S32</b> |
| <b>Figure S27:</b> Fluorescence responses of 10 $\mu$ M probes <b>A</b> (left) and <b>B</b> (right) (10 $\mu$ M) in 10 % EtOH under pH changes between 4.0 and 10.0 under excitation at 465 nm .....                                                                                                                                                                                                                                                             | <b>S32</b> |
| <b>Figure S28:</b> Fluorescence images of A549 cells incubated with 10 $\mu$ M of probe <b>B</b> in different pH buffers in the presence of 10 $\mu$ M nigericin. The green channel I was used to collect visible fluorescence of the probe from 500 nm to 550 nm while red channel II was utilized to collect red fluorescence from 575 nm to 650 nm of probe <b>B</b> at 488 nm excitation. ....                                                               | <b>S33</b> |
| <b>Figure S29:</b> Fluorescence imaging of A549 cells incubated with 10 $\mu$ M of probes <b>B</b> in normal medium with 20-min treatment of FCCP (10 $\mu$ M), NAC (1 mM) or H <sub>2</sub> O <sub>2</sub> (500 $\mu$ M). The green channel I was used to collect visible fluorescence of probe <b>B</b> from 500 nm to 550 nm while red channel II was utilized to collect red fluorescence from 575 nm to 650 nm of probe <b>B</b> at 488 nm excitation. .... | <b>S34</b> |
| <b>Figure S30:</b> Fluorescence imaging of A549 cells incubated with 10 $\mu$ M of probe <b>B</b> in serum-free medium for different times. The green channel I was used to collect the probe visible fluorescence of from 500 nm to 550 nm while red channel II was utilized to collect the probe fluorescence from 575 nm to 650 nm at 488 nm excitation. ....                                                                                                 | <b>S35</b> |
| <b>Figure S31.</b> Confocal fluorescence microscopy images of A549 cells grown with 10 $\mu$ M probe <b>B</b> under different hypoxia conditions in the absence and presence of 50, 100, 150 $\mu$ M CoCl <sub>2</sub> . The                                                                                                                                                                                                                                     |            |

green channel I was used to collect the probe visible fluorescence from 500 nm to 550 nm while red channel II was utilized to the probe red fluorescence from 575 nm to 650 nm at 488 nm excitation. ....S36

**Table S1:** Excitation energies and oscillator strengths listing for Probe A in water.....S20

**Table S2:** Excitation energies and oscillator strengths listing for Probe A in water .....S21

**Table S3:** Calculated atomic coordinates for Probe AH<sup>+</sup> in water .....S24

**Table S4:** Excitation energies and oscillator strengths listing for Probe AH<sup>+</sup> in water .....S25

**Table S5:** Calculated atomic coordinates for Probe B in water .....S27

**Table S6:** Excitation energies and oscillator strengths listing for Probe B in water .....S29

**Table S7:** Calculated atomic coordinates for Probe BH<sup>+</sup> in water .....S31

**Table S8:** Excitation energies and oscillator strengths listing for Probe BH<sup>+</sup> in water .....S33

## Scheme S1:

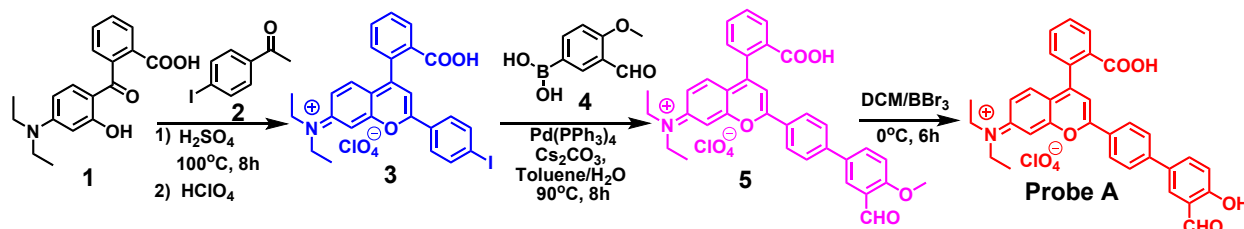

**Synthesis of compound 3:** 2-(4-(diethylamino)-2-hydroxybenzoyl) benzoic acid (1.0 g, 3.19 mmol) and 1-(4-iodophenyl) ethan-1-one (785.22 mg, 3.19 mmol) were put in concentrated sulphuric acid (20.0 mL) and stirred the reaction mixture at 100°C for overnight. After completion of reaction (monitored on TLC), the reaction mixture was cooled down to room temperature, and perchloric acid was added to the mixture to precipitate the produce. The dark purple color precipitate was collected, dried it on air and purified by column chromatography using EtOAc:Hexane (6:4, v/v ) as eluent to get compound **3** with a yield 72%. <sup>1</sup>H NMR (400 MHz, CDCl<sub>3</sub>),  $\delta$  (ppm): 1.10 (6H, t,  $J$  = 6.0 Hz), 3.26 (4H, m), 5.51 (1H, d,  $J$  = 4.0 Hz), 6.35 (1H, m), 6.43 (1H, d,  $J$  = 4.0), 6.52 (1H, d,  $J$  = 8.0 Hz), 7.33 (5H, m) 7.51(3H, m), 7.80 (1H, m).

**Synthesis of compound 5:** Compound **3** (1.0 g, 1.60 mmol) and (3-formyl-4-methoxyphenyl)boronic acid (346.17 mg, 1.92 mmol) were put in toluene/H<sub>2</sub>O (9:1), 20.0 mL followed by the addition of tetrakis(triphenylphosphine)palladium(0) (5.0 mol %) and cesium carbonate (1.30 g, 4.0 mmol). the reaction mixture was stirred for overnight at 90°C under nitrogen atmosphere. After completion of reaction (monitored on TLC), the reaction mixture was cooled down to room temperature, and the solvent was evaporated under reduced pressure. After ice cold water was added to the mixture, extracted with dichloromethane and washed with brine, the organic layer was dried over anhydrous sodium sulfate, and the solvent was evaporated under reduced pressure to get the crude. The crude was used for the next step without further purification.

**Synthesis of probe A:** Compound **5** (632.0 mg, 1.0 mmol) was put in anhydrous dichloromethane (10.0 mL) at 0°C and added boron tribromide (750.0 mg, 3.0 mmol) dropwise in the duration of 20 min. After 2-h warm the reaction mixture at room temperature, and further stirred for 6 hours. After completion of the reaction (monitored on TLC), the reaction mixture was neutralized with saturated sodium bicarbonate (pH 7.0), extracted the reaction mixture with dichloromethane and washed with water. After the organic layer was collected and dried over anhydrous sodium sulfate, the solvent was evaporated under reduced pressure to get the crude product. The crude product was purified by column chromatography using EtOAc:Hexane (7:3, v/v) as eluent to obtain probe **A** with a reaction yield 60%. <sup>1</sup>H NMR (400 MHz, CDCl<sub>3</sub>), δ (ppm): 1.11 (6H, t, *J* = 8.0 Hz), 3.32 (4H, m), 5.57 (1H, d, *J* = 4.0 Hz), 6.36 (1H, m), 6.48 (1H, s), 6.54 (1H, s), 7.05 (1H, t, *J* = 6.0 Hz), 7.22 (2H, m), 7.52 (4H, m), 7.60 (4H, m), 7.92 (1H, d, *J* = 8.0 Hz), 9.96 (1H, s), 11.01 (1H, s). <sup>13</sup>C NMR (101 MHz, CDCl<sub>3</sub>), δ (ppm): 12.62, 44.50, 84.34, 96.98, 97.64, 104.82, 109.24, 118.24, 120.66, 123.79, 124.87, 126.03, 126.49, 126.56, 128.34, 129.29, 131.75, 131.85, 132.03, 132.19, 132.26, 134.37, 135.50, 140.29, 149.25, 152.09, 152.82, 153.68, 161.13, 169.52, 196.43. MS/Z = 518.50

### Scheme S2:

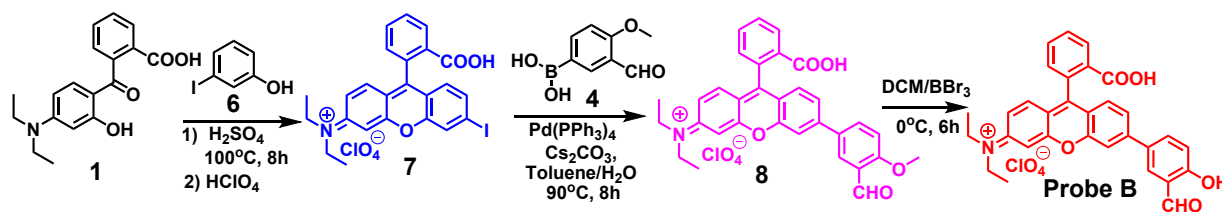

**Synthesis of compound 7:** 2-(4-(diethylamino)-2-hydroxybenzoyl) benzoic acid (1.0 g, 3.19 mmol) and 3-iodophenol (701.83 mg, 3.19 mmol) were taken in concentrated sulphuric acid (20.0 mL) and stirred the reaction mixture for overnight at 100°C. After completion of the reaction (monitored on TLC), the reaction mixture was cooled down to room temperature and perchloric acid was added the mixture to precipitate the product. The dark purple color precipitate was dried on air and purified by column chromatography using dichloromethane as an eluent to

obtain compound **7** with a reaction yield 74%. <sup>1</sup>H NMR (400 MHz, CDCl<sub>3</sub>), δ (ppm): 1.12 (6H, t, *J* = 6.0 Hz), 3.30 (4H, m), 5.26 (1H, s), 6.31 (1H, m), 6.45 (2H, m), 6.51 (1H, d, *J* = 6.0 Hz), 7.12 (1H, m), 7.22 (1H, m), 7.55 (3H, m), 7.96 (1H, m).

**Synthesis of compound 8:** Compound **7** (1.0 g, 1.67 mmol) and (3-formyl-4-methoxyphenyl)boronic acid (361.25 mg, 2.00 mmol) were put in toluene/H<sub>2</sub>O (9:1), 20 mL followed by the addition of tetrakis(triphenylphosphine)palladium(0) (5.0 mol %) and cesium carbonate (1.36 g, 4.17 mmol). The reaction mixture was stirred for overnight at 90°C under nitrogen atmosphere. After completion of the reaction (monitored on TLC), the reaction mixture was cooled down to room temperature and the solvent of the mixture was evaporated under reduced pressure. After ice cold water was added to the mixture, extracted with dichloromethane and washed with brine. After the organic layer was collected, dried over anhydrous sodium sulfate, and filtered, the filtrate was evaporated under reduced pressure to get crude. The crude was used for the next step without further purification.

**Synthesis of probe B:** Compound **8** (606.0 mg, 1.0 mmol) was put in anhydrous dichloromethane (10.0 mL) at 0 °C and added boron tribromide (750.00 mg, 3.0 mmol) dropwise in the duration of 20 min. After 2-h warm the reaction at room temperature, the mixture was further stirred for 6 hours. After completion of the reaction (monitored on TLC), the reaction mixture was neutralized with saturated sodium bicarbonate (pH 7.0), extracted the reaction mixture with dichloromethane and washed with water. The organic layer was collected, dried over anhydrous sodium sulfate and evaporated under reduced pressure to get the crude product. The crude product was purified by column chromatography using EtOAc:Hexane (6:4, v/v) as an eluent to afford probe B with a reaction yield 65%. <sup>1</sup>H NMR (400 MHz, CDCl<sub>3</sub>), δ (ppm): 1.13 (6H, t, *J* = 8.0 Hz), 3.31 (4H, m), 6.33 (1H, m), 6.44 (1H, d, *J* = 4.0 Hz), 6.56 (1H, d, *J* = 8.0 Hz), 6.80 (1H, d, *J* = 8.0 Hz), 7.04 (1H, m), 7.13 (3H, m), 7.40 (1H, d, *J* = 4.0 Hz), 7.57 (2H, m), 7.63 (2H, t, *J* = 6.0 Hz), 7.99 (1H, d, *J* = 8.0 Hz), 9.94 (1H, s), 11.01 (1H, s). <sup>13</sup>C NMR (101 MHz, CDCl<sub>3</sub>), δ (ppm): 12.59, 44.54, 83.76, 97.48, 104.80, 108.45, 114.68, 118.28, 118.39, 120.63, 121.37, 123.92, 124.89, 127.02,

128.70, 128.89, 134.75, 135.48, 141.39, 149.56 152.01, 152.70, 153.00, 161.29, 169.42, 196.35.  
MS/Z = 492.50

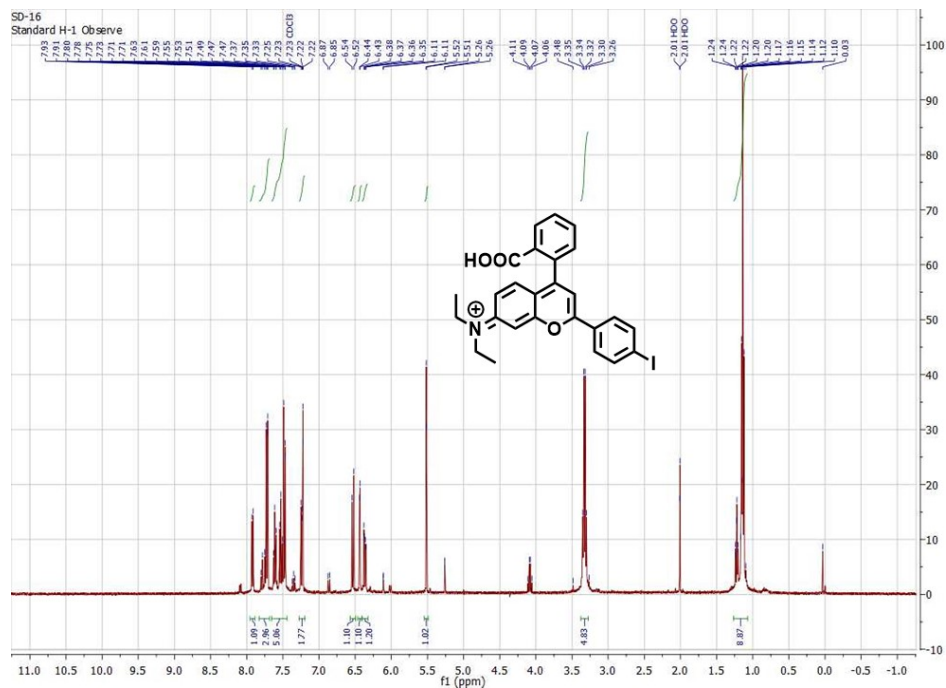

Figure S1:  $^1\text{H}$  NMR spectrum of compound 3 in  $\text{CDCl}_3$ .



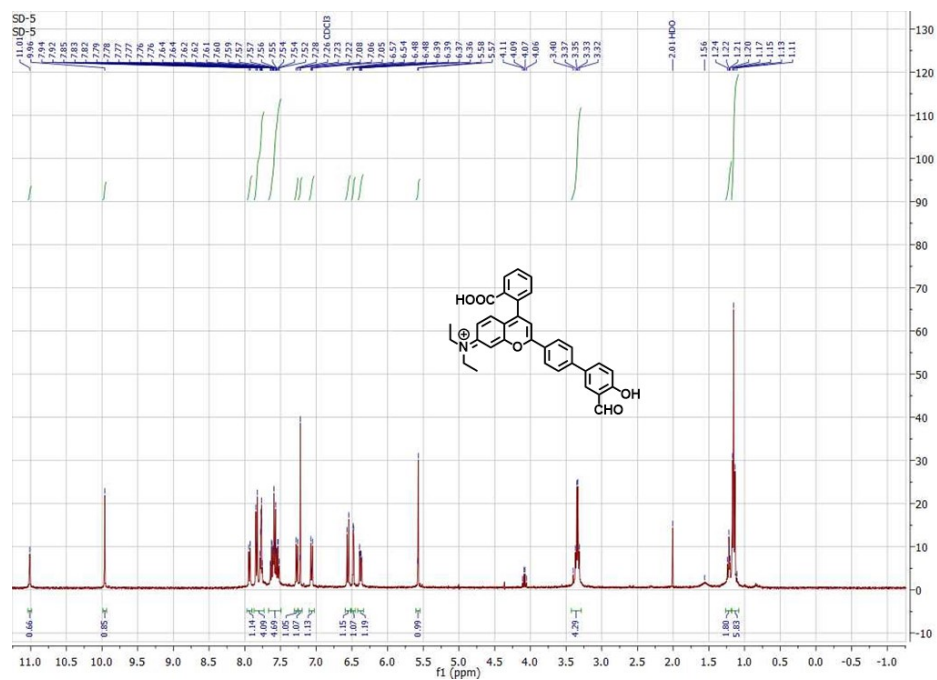

Figure S2:  $^1\text{H}$  NMR spectrum of probe A in  $\text{CDCl}_3$ .

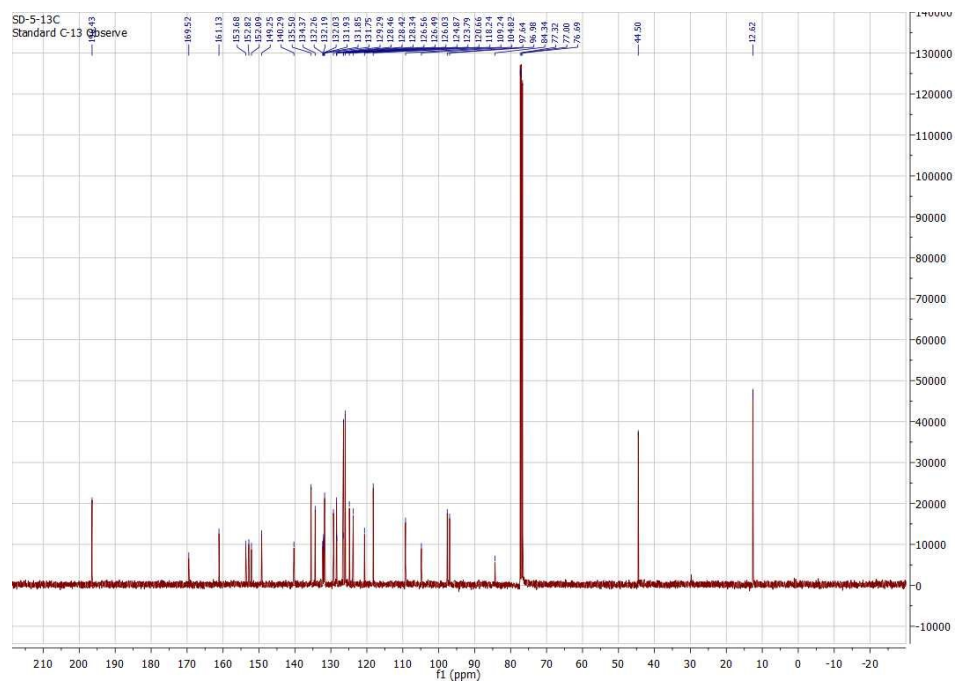

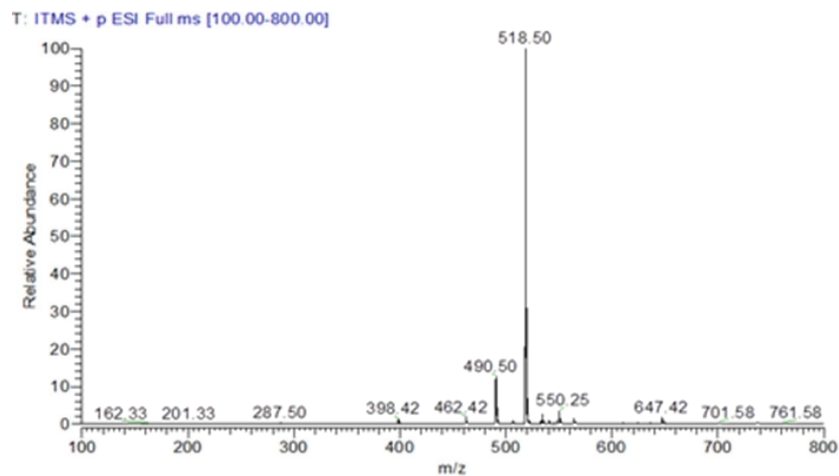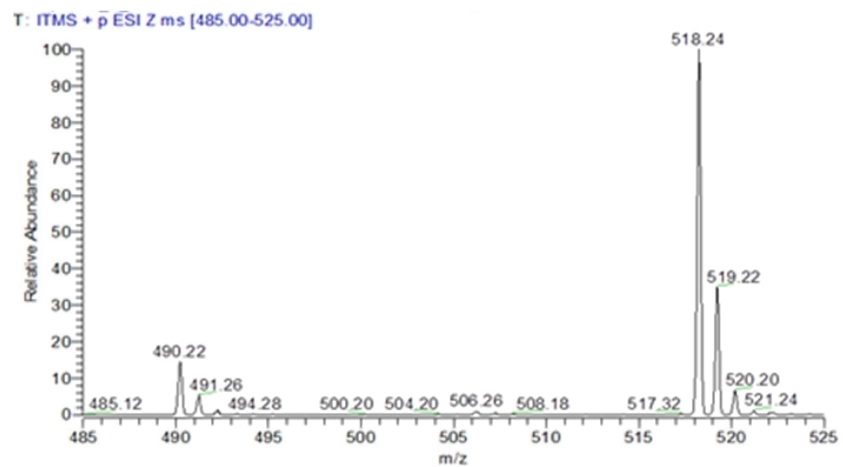

Figure S4: LC-MS spectrum of probe A.



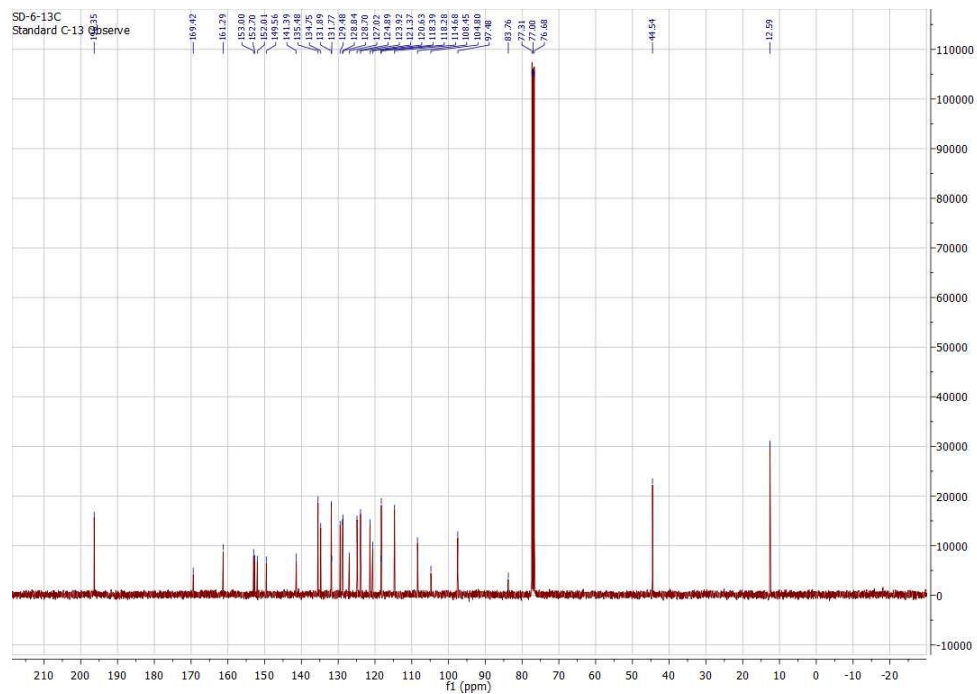

Figure S7:  $^{13}\text{C}$  NMR spectrum of probe **B** in  $\text{CDCl}_3$ .

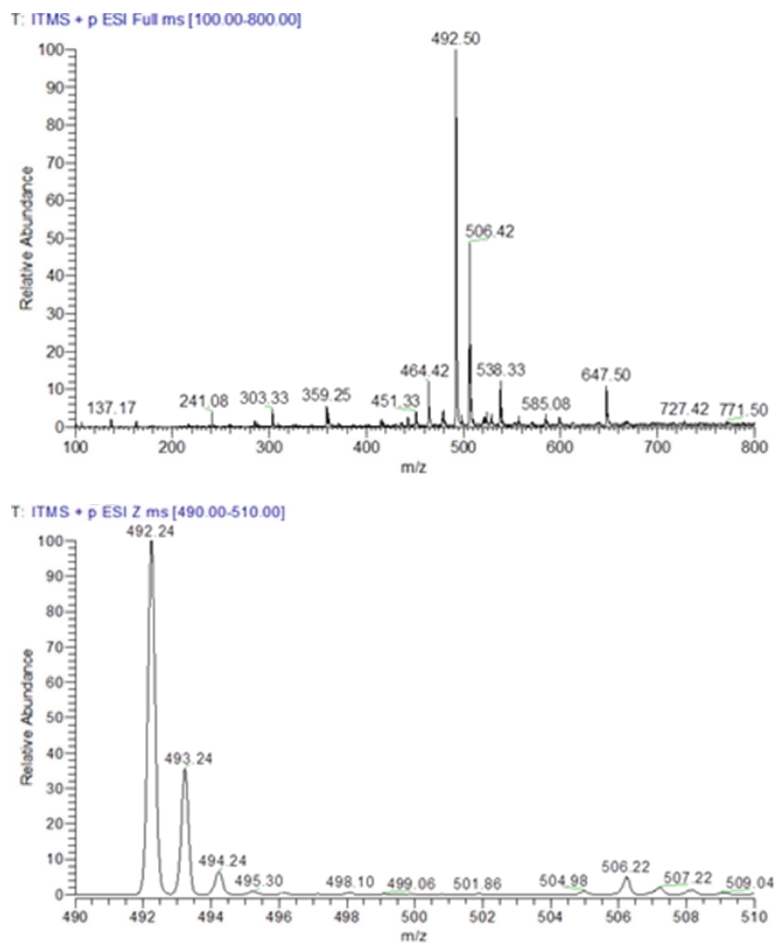

Figure S8: LC-MS spectrum of probe B.

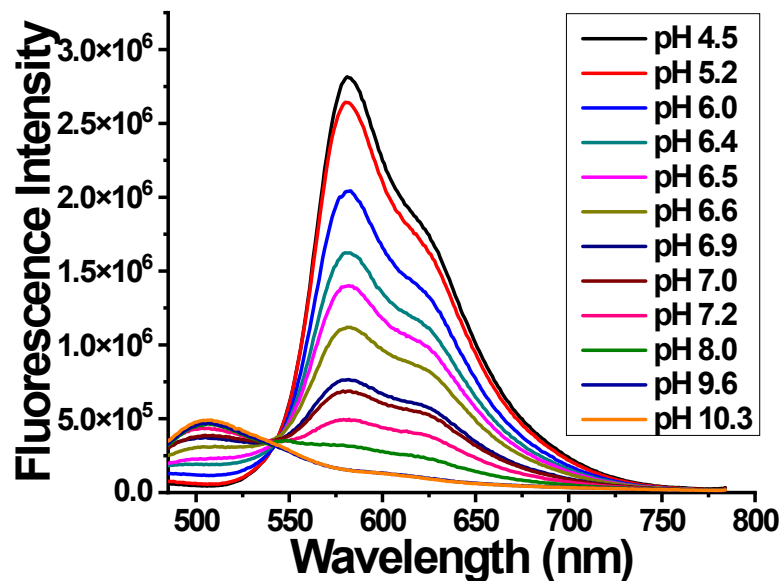

Figure S9: Fluorescence spectra of probes B (10  $\mu$ M) in different pH buffers containing 10% EtOH.

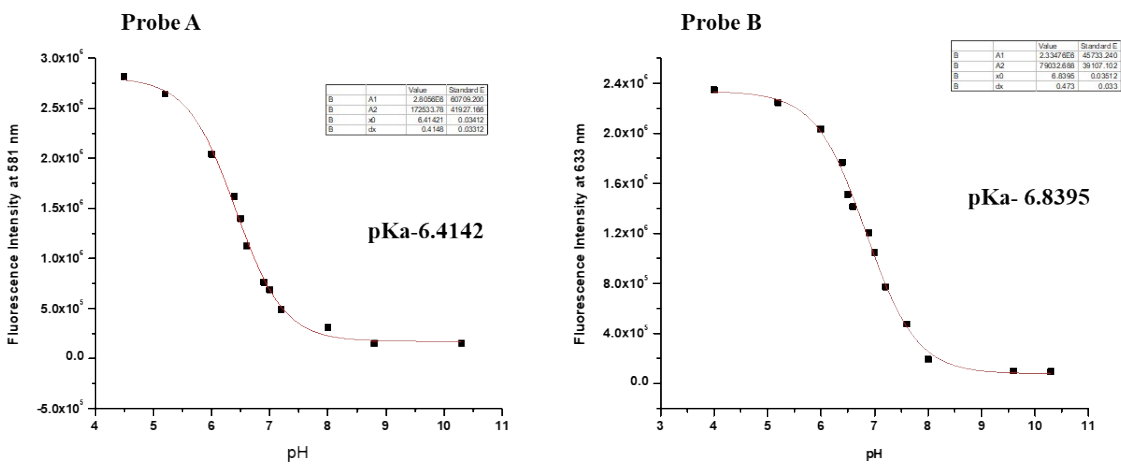

Figure S10: Plot curve of fluorescence intensity of 10  $\mu$ M probes AH<sup>+</sup> (left) and BH<sup>+</sup> (right) versus pH.

## Theoretical Calculations

### Methods.

Models of all probes were generated as described previously[1]. Convergence of the atomic positions in the models were obtained using Gaussian 16 [2] and density functional theory (DFT), using the APFD functional [3] and electron basis sets at the 6-311+qg(d,p) level in a Polarizable Continuum Model (PCM) of water [4]. Imaginary frequencies were not obtained.  $s$  were assessed, using TD-DFT optimizations in a PCM in water with the 6-311+g(d,p) basis set. Results were interpreted using GaussView 6 [5] for all data and figures.

### Results of the theoretical calculations.

Theoretical calculations for probe **A**.

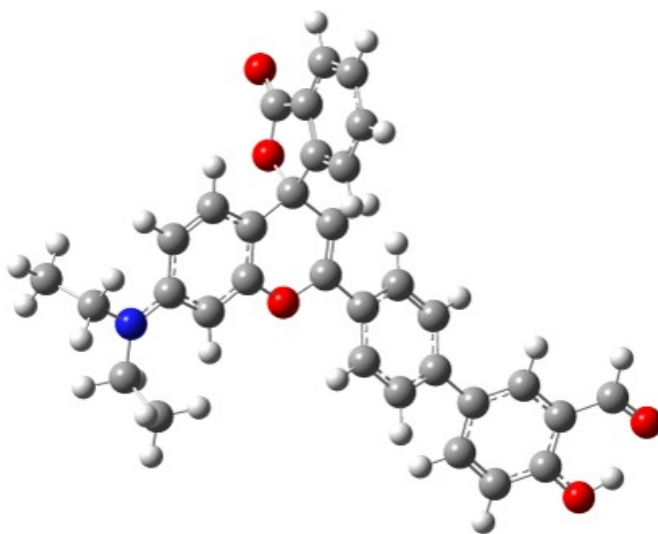

**Figure S11:** GaussView representation of probe **A**.

**Table S1:** Excitation energies and oscillator strengths listing for Probe A in water.

Calculated atomic coordinates for Probe A in water.

| Row | Symbol | X        | Y        | Z        | Row | Symbol | X        | Y        | Z        |
|-----|--------|----------|----------|----------|-----|--------|----------|----------|----------|
| 1   | C      | -0.83278 | 1.453805 | -0.29003 | 34  | C      | 8.243755 | -1.09335 | -0.0542  |
| 2   | C      | -0.24026 | 0.250006 | -0.31612 | 35  | C      | 7.369191 | -2.13305 | -0.37677 |
| 3   | C      | 1.210746 | 0.022179 | -0.29564 | 36  | C      | 6.00669  | -1.89936 | -0.42104 |
| 4   | C      | -2.30725 | 1.62496  | -0.35413 | 37  | O      | 9.558016 | -1.33629 | -0.01591 |
| 5   | C      | -3.00837 | 0.320341 | -0.17884 | 38  | C      | 8.594703 | 1.281404 | 0.57299  |
| 6   | C      | -2.29992 | -0.87771 | -0.20608 | 39  | O      | 9.817512 | 1.173935 | 0.639688 |
| 7   | O      | -0.93668 | -0.91662 | -0.32804 | 40  | H      | -0.22476 | 2.34704  | -0.22744 |
| 8   | C      | -4.39545 | 0.227086 | -0.02302 | 41  | H      | -4.98259 | 1.140994 | 0.000865 |
| 9   | C      | -5.04196 | -0.98457 | 0.087029 | 42  | H      | -6.11974 | -0.99199 | 0.183847 |
| 10  | C      | -4.31355 | -2.20444 | 0.054769 | 43  | H      | -2.28298 | -2.9916  | -0.09224 |
| 11  | C      | -2.91682 | -2.11467 | -0.09006 | 44  | H      | -4.91928 | -5.40679 | -0.36101 |
| 12  | N      | -4.94219 | -3.41179 | 0.164589 | 45  | H      | -3.44708 | -4.55286 | -0.74115 |
| 13  | C      | -4.21714 | -4.66354 | 0.027993 | 46  | H      | -2.89913 | -4.42804 | 1.743537 |
| 14  | C      | -3.61009 | -5.15388 | 1.339664 | 47  | H      | -4.38967 | -5.3153  | 2.090038 |
| 15  | C      | -7.22031 | -3.49562 | -0.8322  | 48  | H      | -3.0831  | -6.10086 | 1.189569 |
| 16  | C      | -6.36726 | -3.51498 | 0.432779 | 49  | H      | -8.28123 | -3.59223 | -0.58276 |
| 17  | C      | -2.80796 | 2.714494 | 0.55619  | 50  | H      | -7.08336 | -2.56363 | -1.38734 |
| 18  | C      | -2.77621 | 2.775701 | 1.940924 | 51  | H      | -6.9509  | -4.32449 | -1.49352 |
| 19  | C      | -3.3136  | 3.907764 | 2.549692 | 52  | H      | -6.52835 | -4.44894 | 0.979282 |
| 20  | C      | -3.86825 | 4.948442 | 1.792533 | 53  | H      | -6.66722 | -2.71711 | 1.117851 |
| 21  | C      | -3.89542 | 4.87751  | 0.404678 | 54  | H      | -2.35095 | 1.969207 | 2.52944  |
| 22  | C      | -3.35509 | 3.742452 | -0.18946 | 55  | H      | -3.30476 | 3.986705 | 3.632366 |
| 23  | C      | -3.24691 | 3.389581 | -1.61518 | 56  | H      | -4.27962 | 5.815752 | 2.298462 |
| 24  | O      | -3.60389 | 4.01485  | -2.58804 | 57  | H      | -4.32149 | 5.672666 | -0.19815 |
| 25  | O      | -2.65405 | 2.183172 | -1.70974 | 58  | H      | 1.055999 | -1.93568 | 0.583777 |
| 26  | C      | 1.730883 | -1.17432 | 0.2095   | 59  | H      | 3.482152 | -2.30719 | 0.682353 |
| 27  | C      | 3.101635 | -1.38372 | 0.256943 | 60  | H      | 4.137746 | 1.531466 | -1.12853 |
| 28  | C      | 3.995931 | -0.4113  | -0.20485 | 61  | H      | 1.720891 | 1.907556 | -1.2131  |
| 29  | C      | 3.468676 | 0.778101 | -0.72459 | 62  | H      | 5.945057 | 1.385375 | 0.406453 |
| 30  | C      | 2.100071 | 0.991633 | -0.77228 | 63  | H      | 7.775874 | -3.11392 | -0.59857 |
| 31  | C      | 5.453007 | -0.63263 | -0.15126 | 64  | H      | 5.346605 | -2.71718 | -0.69366 |
| 32  | C      | 6.327819 | 0.39633  | 0.169134 | 65  | H      | 9.999718 | -0.49009 | 0.228426 |
| 33  | C      | 7.712097 | 0.188466 | 0.222423 | 66  | H      | 8.116451 | 2.252466 | 0.786393 |



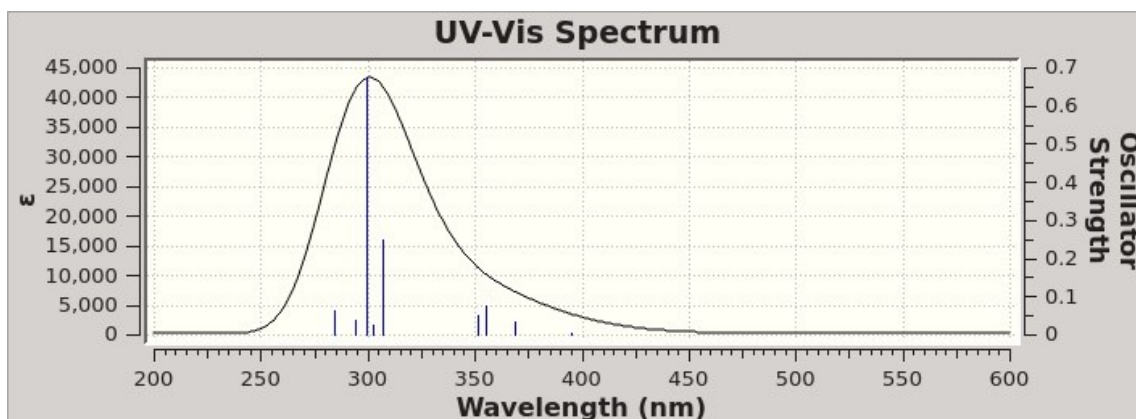

**Figure S12:** Calculated UV-Vis spectrum for probe **A** in water.

**Table S2:** Excitation energies and oscillator strengths listing for Probe **A** in water.

| Excited State | Nature | E (eV) | $\lambda_{max}$ (nm) | $f$    | Orbital transitions                                                              | Normalized coefficient                                             |
|---------------|--------|--------|----------------------|--------|----------------------------------------------------------------------------------|--------------------------------------------------------------------|
| 1:            | A      | 3.1373 | 395.20               | 0.0026 | 136 -> 137                                                                       | 0.70320                                                            |
| 2:            | A      | 3.3643 | 368.53               | 0.0320 | 136 -> 138<br>136 -> 139                                                         | 0.67582<br>-0.18896                                                |
| 3:            | A      | 3.4929 | 354.96               | 0.0754 | 136 -> 138<br>136 -> 139                                                         | 0.18385<br>0.67433                                                 |
| 4:            | A      | 3.5312 | 351.11               | 0.0488 | 134 -> 137<br>135 -> 137                                                         | 0.15617<br>0.67415                                                 |
| 5:            | A      | 4.0397 | 306.92               | 0.0408 | 128 -> 137<br>135 -> 138                                                         | 0.63339<br>0.23733                                                 |
| 6:            | A      | 4.0414 | 306.78               | 0.2501 | 128 -> 137<br>134 -> 137<br>134 -> 138<br>134 -> 139<br>135 -> 138<br>135 -> 139 | -0.26008<br>-0.10852<br>-0.15113<br>0.13632<br>0.58835<br>-0.11128 |
| 7:            | A      | 4.0975 | 302.58               | 0.0267 | 133 -> 137<br>134 -> 137<br>135 -> 137<br>135 -> 139                             | 0.12568<br>0.61000<br>-0.16502<br>-0.24767                         |
| 8:            | A      | 4.1448 | 299.13               | 0.6704 | 134 -> 137<br>134 -> 138<br>134 -> 139<br>135 -> 138<br>135 -> 139               | 0.23859<br>0.12387<br>-0.10132<br>0.21090<br>0.59564               |

|     |   |        |        |        |            |          |
|-----|---|--------|--------|--------|------------|----------|
| 9:  | A | 4.2148 | 294.16 | 0.0383 | 136 -> 140 | 0.69316  |
| 10: | A | 4.3617 | 284.26 | 0.0619 | 136 -> 141 | -0.31539 |
|     |   |        |        |        | 136 -> 142 | 0.52231  |
|     |   |        |        |        | 136 -> 143 | -0.22865 |
|     |   |        |        |        | 136 -> 144 | 0.19200  |

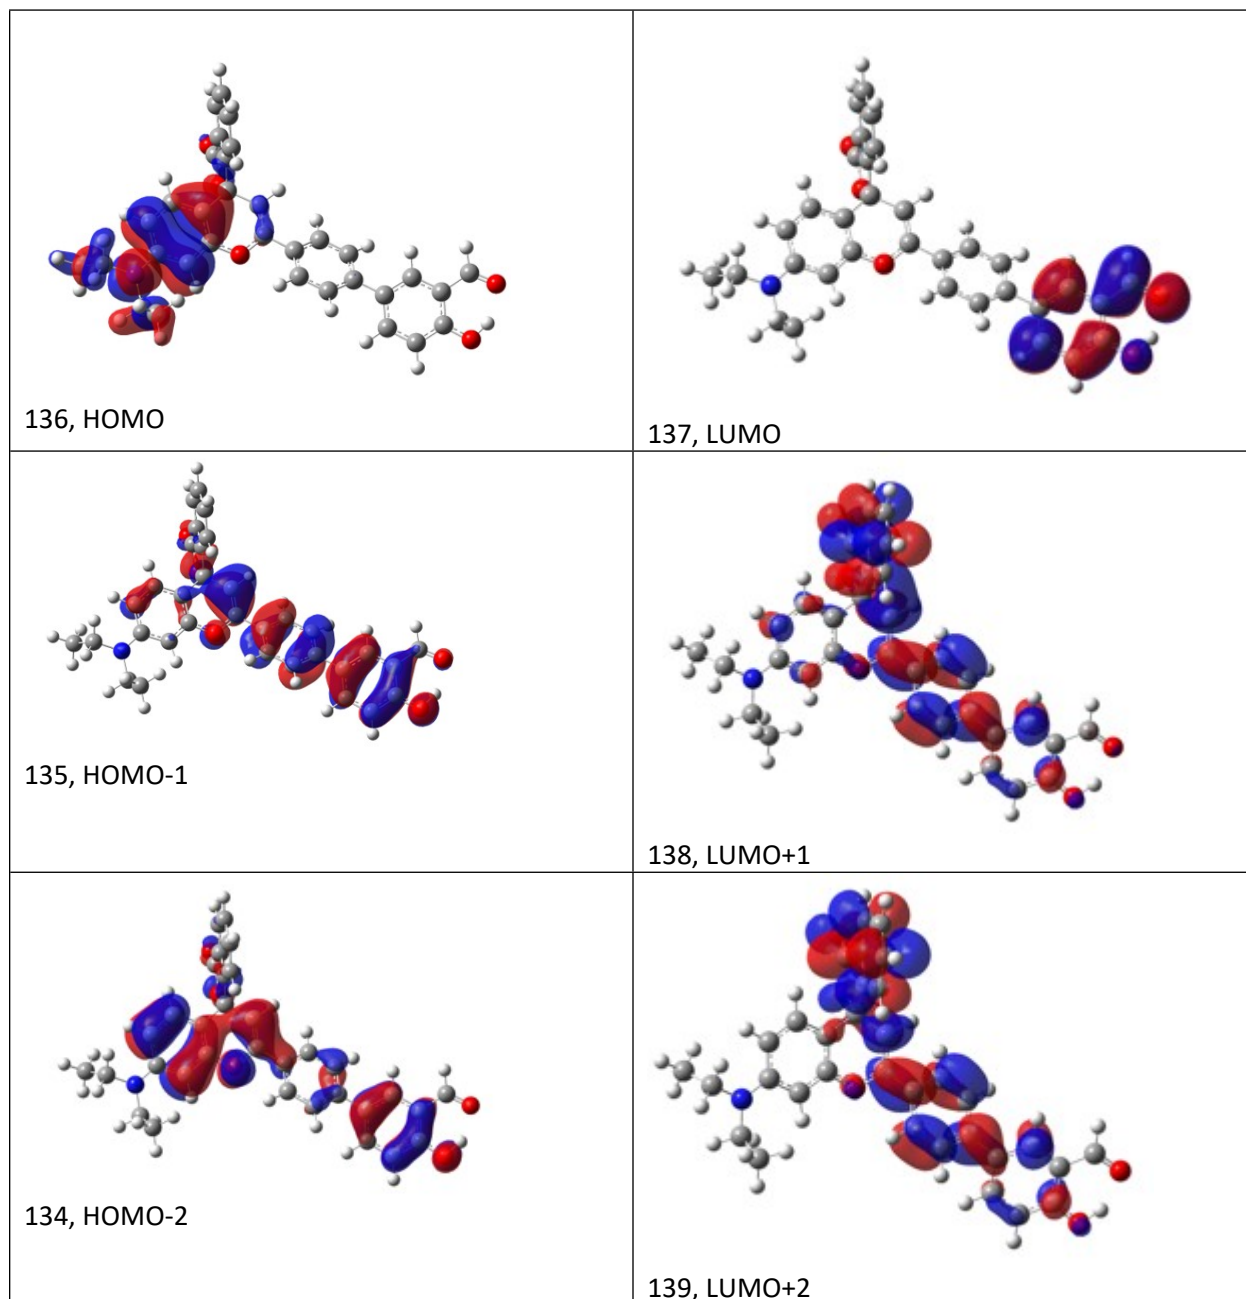

**Figure S13:** Drawings of selected molecular orbitals listed in Table S2.

Theoretical calculations for probe  $\text{AH}^+$ .

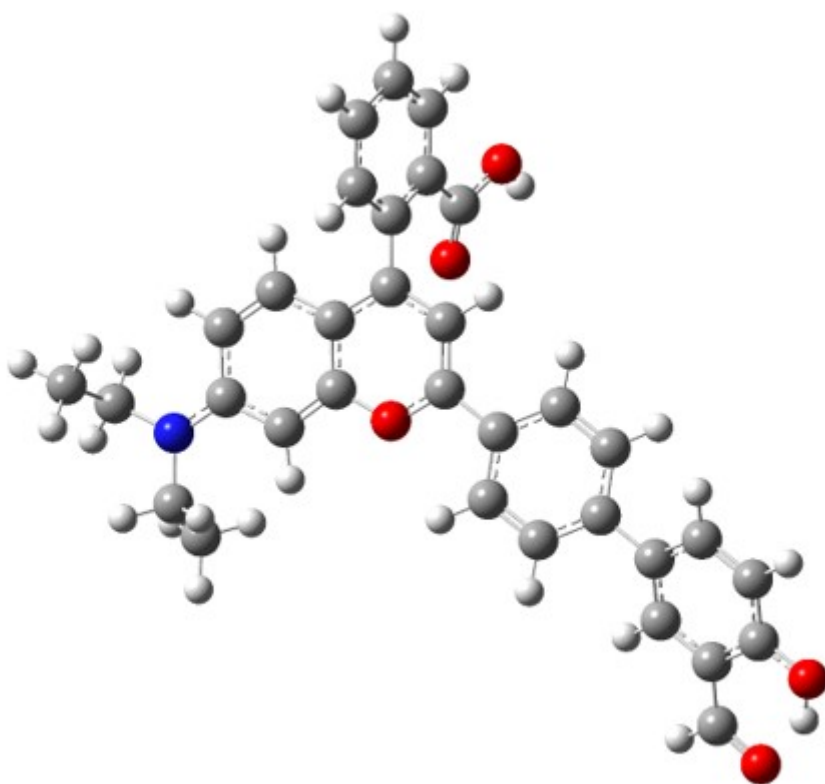

**Figure S14:** GaussView representation of probe  $\text{AH}^+$ .

**Table S3:** Calculated atomic coordinates for Probe AH<sup>+</sup> in water.

| Row | Symbol | X        | Y        | Z        | Row | Symbol | X        | Y        | Z        |
|-----|--------|----------|----------|----------|-----|--------|----------|----------|----------|
| 1   | C      | -1.05789 | -1.48511 | -0.33529 | 35  | C      | 7.600368 | -1.21982 | -0.99993 |
| 2   | C      | -0.26717 | -0.36193 | -0.26987 | 36  | C      | 6.218721 | -1.23226 | -0.97235 |
| 3   | C      | 1.184503 | -0.32983 | -0.28644 | 37  | O      | 9.634663 | -0.18793 | -0.41189 |
| 4   | C      | -2.45145 | -1.36886 | -0.30706 | 38  | C      | 8.274282 | 1.924186 | 0.933856 |
| 5   | C      | -3.0313  | -0.10137 | -0.23258 | 39  | O      | 9.49894  | 2.019616 | 0.965125 |
| 6   | C      | -2.17129 | 1.026011 | -0.17667 | 40  | H      | -0.60182 | -2.46086 | -0.41967 |
| 7   | O      | -0.82724 | 0.850253 | -0.19202 | 41  | H      | -5.11479 | -0.67366 | -0.21033 |
| 8   | C      | -4.42406 | 0.161457 | -0.17837 | 42  | H      | -5.96989 | 1.586412 | -0.06447 |
| 9   | C      | -4.89961 | 1.433696 | -0.09089 | 43  | H      | -1.89322 | 3.112922 | -0.03681 |
| 10  | C      | -4.01532 | 2.567073 | -0.04985 | 44  | H      | -4.21017 | 5.801321 | -0.4557  |
| 11  | C      | -2.62383 | 2.318206 | -0.0918  | 45  | H      | -2.80775 | 4.795813 | -0.71154 |
| 12  | N      | -4.50215 | 3.817035 | 0.025751 | 46  | H      | -3.94214 | 5.613293 | 2.035486 |
| 13  | C      | -3.62894 | 4.98668  | -0.01732 | 47  | H      | -2.5226  | 4.580481 | 1.811528 |
| 14  | C      | -3.11285 | 5.382679 | 1.361199 | 48  | H      | -2.48052 | 6.271079 | 1.284255 |
| 15  | C      | -6.63497 | 4.20393  | -1.18656 | 49  | H      | -7.6909  | 4.446181 | -1.04015 |
| 16  | C      | -5.92992 | 4.099565 | 0.160152 | 50  | H      | -6.18812 | 4.990362 | -1.80096 |
| 17  | C      | -3.28419 | -2.58429 | -0.45178 | 51  | H      | -6.5729  | 3.263959 | -1.7412  |
| 18  | C      | -3.90388 | -2.80045 | -1.68143 | 52  | H      | -6.39217 | 3.342258 | 0.795826 |
| 19  | C      | -4.65042 | -3.95334 | -1.90306 | 53  | H      | -6.0135  | 5.04061  | 0.709018 |
| 20  | C      | -4.78449 | -4.90205 | -0.89486 | 54  | H      | -3.78658 | -2.06528 | -2.47082 |
| 21  | C      | -4.17432 | -4.69308 | 0.335101 | 55  | H      | -5.12543 | -4.10752 | -2.86641 |
| 22  | C      | -3.42654 | -3.53718 | 0.569667 | 56  | H      | -5.36803 | -5.80086 | -1.06314 |
| 23  | C      | -2.84189 | -3.27656 | 1.908481 | 57  | H      | -4.28763 | -5.41955 | 1.130886 |
| 24  | O      | -2.4321  | -2.19686 | 2.275102 | 58  | H      | -2.46048 | -4.11332 | 3.547947 |
| 25  | O      | -2.82332 | -4.36598 | 2.687071 | 59  | H      | 1.438207 | -2.47285 | -0.08736 |
| 26  | C      | 1.931484 | -1.51395 | -0.19557 | 60  | H      | 3.86832  | -2.40131 | -0.109   |
| 27  | C      | 3.313421 | -1.47485 | -0.2117  | 61  | H      | 3.755502 | 1.875705 | -0.52733 |
| 28  | C      | 4.001354 | -0.25758 | -0.32134 | 62  | H      | 1.309284 | 1.816533 | -0.47508 |
| 29  | C      | 3.250049 | 0.922503 | -0.4128  | 63  | H      | 5.642181 | 1.597892 | 0.803641 |
| 30  | C      | 1.867353 | 0.891664 | -0.39172 | 64  | H      | 8.156697 | -2.0012  | -1.50618 |
| 31  | C      | 5.472651 | -0.22043 | -0.33559 | 65  | H      | 5.696028 | -2.03717 | -1.47967 |
| 32  | C      | 6.173967 | 0.808772 | 0.279262 | 66  | H      | 9.938834 | 0.612823 | 0.075971 |
| 33  | C      | 7.572849 | 0.843801 | 0.270733 | 67  | H      | 7.650524 | 2.688261 | 1.427815 |
| 34  | C      | 8.300104 | -0.18301 | -0.37764 |     |        |          |          |          |

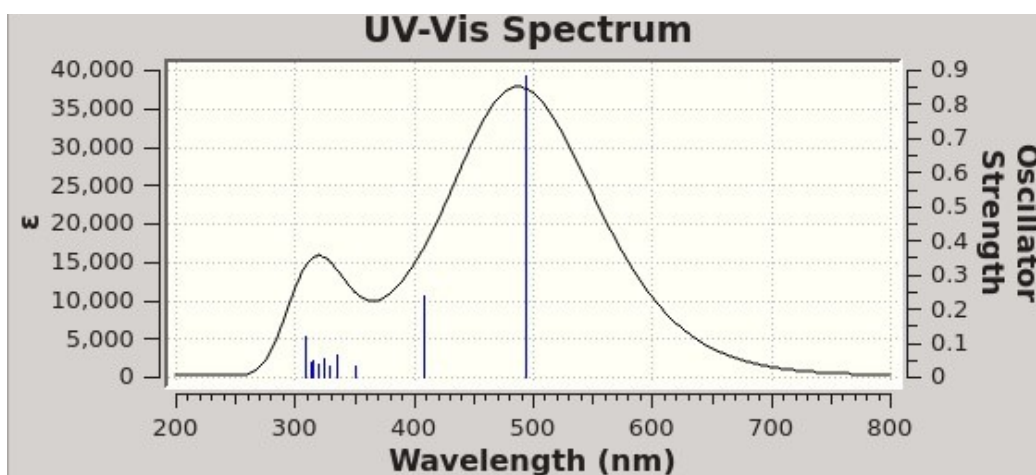

**Figure S15:** Calculated UV-Vis spectrum for probe  $\text{AH}^+$  in water.

**Table S4:** Excitation energies and oscillator strengths listing for Probe  $\text{AH}^+$  in water.

| Excited State | Nature | $E$ (eV) | $\lambda(\lambda)$ (nm) | $f$    | Orbital                                                            | Normalized                                           |
|---------------|--------|----------|-------------------------|--------|--------------------------------------------------------------------|------------------------------------------------------|
| 1:            | A      | 2.5128   | 493.42                  | 0.8843 | 136 -> 137                                                         | 0.70250                                              |
| 2:            | A      | 3.0404   | 407.79                  | 0.2370 | 135 -> 137                                                         | 0.69508                                              |
| 3:            | A      | 3.5367   | 350.56                  | 0.0304 | 135 -> 138<br>136 -> 138                                           | -0.26617<br>0.64585                                  |
| 4:            | A      | 3.7036   | 334.76                  | 0.0631 | 134 -> 137<br>136 -> 140                                           | 0.67470<br>-0.13382                                  |
| 5:            | A      | 3.7614   | 329.62                  | 0.0315 | 136 -> 139                                                         | 0.69421                                              |
| 6:            | A      | 3.8306   | 323.67                  | 0.0553 | 128 -> 137<br>131 -> 137<br>132 -> 137<br>133 -> 137<br>136 -> 140 | -0.16883<br>0.23189<br>0.17189<br>0.57487<br>0.16203 |
| 7:            | A      | 3.8803   | 319.52                  | 0.0353 | 128 -> 137<br>131 -> 137<br>132 -> 137                             | 0.15648<br>-0.22250<br>0.62142                       |
| 8:            | A      | 3.9335   | 315.20                  | 0.0504 | 135 -> 138<br>136 -> 138                                           | 0.61880<br>0.28003                                   |

|     |   |        |        |        |            |          |
|-----|---|--------|--------|--------|------------|----------|
| 9:  | A | 3.9499 | 313.89 | 0.0437 | 128 -> 137 | 0.11485  |
|     |   |        |        |        | 129 -> 137 | 0.10427  |
|     |   |        |        |        | 130 -> 137 | -0.16404 |
|     |   |        |        |        | 131 -> 137 | 0.60815  |
|     |   |        |        |        | 132 -> 137 | 0.13951  |
|     |   |        |        |        | 133 -> 137 | -0.20421 |
| 10: | A | 4.0139 | 308.89 | 0.1200 | 128 -> 137 | -0.30977 |
|     |   |        |        |        | 129 -> 137 | -0.10021 |
|     |   |        |        |        | 132 -> 137 | 0.16321  |
|     |   |        |        |        | 133 -> 137 | -0.28934 |
|     |   |        |        |        | 134 -> 137 | 0.10725  |
|     |   |        |        |        | 136 -> 140 | 0.48483  |

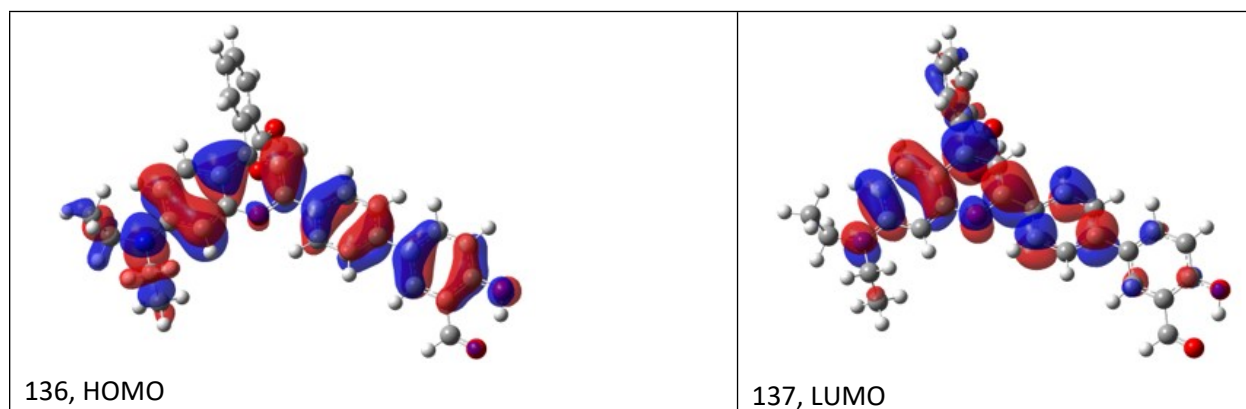

**Figure S16:** Drawings of selected molecular orbitals listed in Table S4.

Theoretical calculations for probe B.

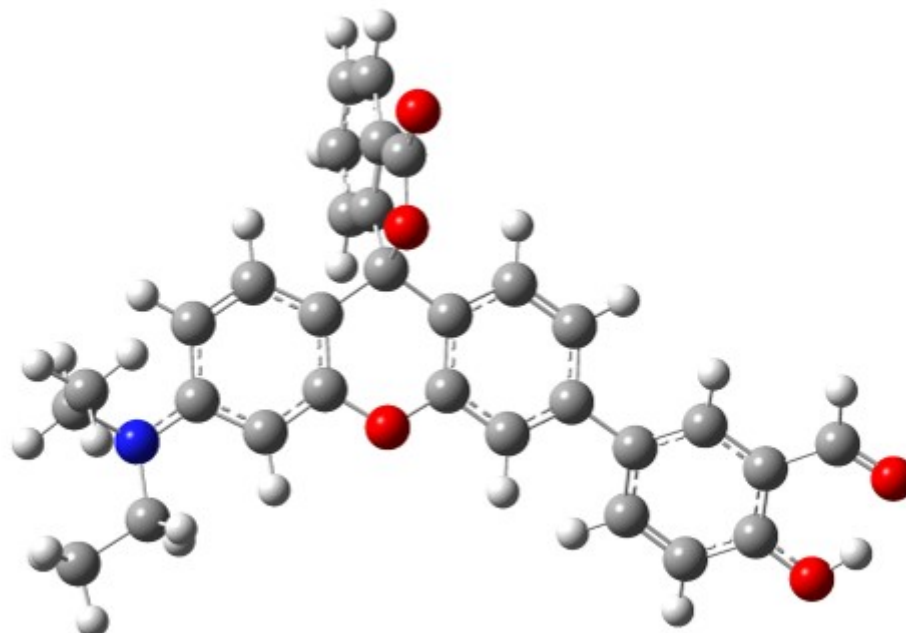

Figure S17: GaussView representation of probe B.

Table S5: Calculated atomic coordinates for Probe B in water.

| Row | Symbol | X        | Y        | Z        | Row | Symbol | X        | Y        | Z        |
|-----|--------|----------|----------|----------|-----|--------|----------|----------|----------|
| 1   | C      | -0.2574  | 0.8701   | -0.08973 | 15  | N      | 5.130788 | -2.62847 | 0.258636 |
| 2   | C      | -0.46565 | -0.50488 | -0.00939 | 16  | C      | 4.701478 | -4.02487 | 0.195099 |
| 3   | C      | -1.75021 | -1.0349  | 0.086218 | 17  | C      | 5.770027 | -5.03699 | 0.575244 |
| 4   | C      | -2.85881 | -0.19496 | 0.105698 | 18  | C      | 6.733184 | -2.27242 | -1.62167 |
| 5   | C      | -2.65655 | 1.193258 | 0.028886 | 19  | C      | 6.507462 | -2.32399 | -0.11328 |
| 6   | C      | -1.37699 | 1.706068 | -0.06667 | 20  | C      | 1.369787 | 2.643475 | 0.621847 |
| 7   | C      | 1.126576 | 1.434635 | -0.24323 | 21  | C      | 1.396184 | 2.739034 | 2.004387 |
| 8   | C      | 2.170156 | 0.37634  | -0.08437 | 22  | C      | 1.650672 | 3.991242 | 2.558252 |
| 9   | C      | 1.838255 | -0.97175 | -0.01162 | 23  | C      | 1.87371  | 5.114924 | 1.750439 |
| 10  | O      | 0.544939 | -1.4169  | -0.02082 | 24  | C      | 1.846473 | 5.007982 | 0.365408 |
| 11  | C      | 3.534223 | 0.688631 | -0.06455 | 25  | C      | 1.59008  | 3.752054 | -0.17416 |
| 12  | C      | 4.510117 | -0.27841 | 0.024715 | 26  | C      | 1.50023  | 3.335221 | -1.58286 |
| 13  | C      | 4.167649 | -1.65408 | 0.11564  | 27  | O      | 1.628391 | 3.990956 | -2.58987 |
| 14  | C      | 2.799058 | -1.97178 | 0.078491 | 28  | O      | 1.233485 | 2.010575 | -1.61554 |

| Row | Symbol | X        | Y        | Z        | Row | Symbol | X        | Y        | Z        |
|-----|--------|----------|----------|----------|-----|--------|----------|----------|----------|
| 29  | C      | -4.22043 | -0.75428 | 0.210121 | 46  | H      | 5.310793 | -6.02821 | 0.614543 |
| 30  | C      | -5.27915 | -0.20722 | -0.50072 | 47  | H      | 6.586471 | -5.08568 | -0.14939 |
| 31  | C      | -6.57243 | -0.73664 | -0.40589 | 48  | H      | 6.191626 | -4.82464 | 1.562084 |
| 32  | C      | -6.81857 | -1.85117 | 0.430442 | 49  | H      | 7.778002 | -2.03911 | -1.84656 |
| 33  | C      | -5.75718 | -2.40546 | 1.14891  | 50  | H      | 6.494278 | -3.23426 | -2.08544 |
| 34  | C      | -4.48992 | -1.86334 | 1.034762 | 51  | H      | 6.105293 | -1.50719 | -2.08708 |
| 35  | O      | -8.03737 | -2.3867  | 0.552807 | 52  | H      | 6.800656 | -1.38356 | 0.356533 |
| 36  | C      | -7.652   | -0.14868 | -1.17098 | 53  | H      | 7.150411 | -3.07838 | 0.33968  |
| 37  | O      | -8.8107  | -0.55786 | -1.13768 | 54  | H      | 1.225852 | 1.870712 | 2.632334 |
| 38  | H      | -1.86037 | -2.11354 | 0.121733 | 55  | H      | 1.67805  | 4.101426 | 3.637824 |
| 39  | H      | -3.50548 | 1.867175 | 0.07098  | 56  | H      | 2.069775 | 6.075466 | 2.21544  |
| 40  | H      | -1.23003 | 2.780985 | -0.11478 | 57  | H      | 2.017643 | 5.865926 | -0.2762  |
| 41  | H      | 3.832941 | 1.731361 | -0.12687 | 58  | H      | -5.11433 | 0.636564 | -1.16529 |
| 42  | H      | 5.545283 | 0.034642 | 0.025445 | 59  | H      | -5.94606 | -3.25354 | 1.798283 |
| 43  | H      | 2.441987 | -2.99162 | 0.11419  | 60  | H      | -3.68291 | -2.29705 | 1.617545 |
| 44  | H      | 3.86747  | -4.14188 | 0.892531 | 61  | H      | -8.64061 | -1.864   | -0.0249  |
| 45  | H      | 4.309237 | -4.25827 | -0.80744 | 62  | H      | -7.39169 | 0.712534 | -1.80952 |

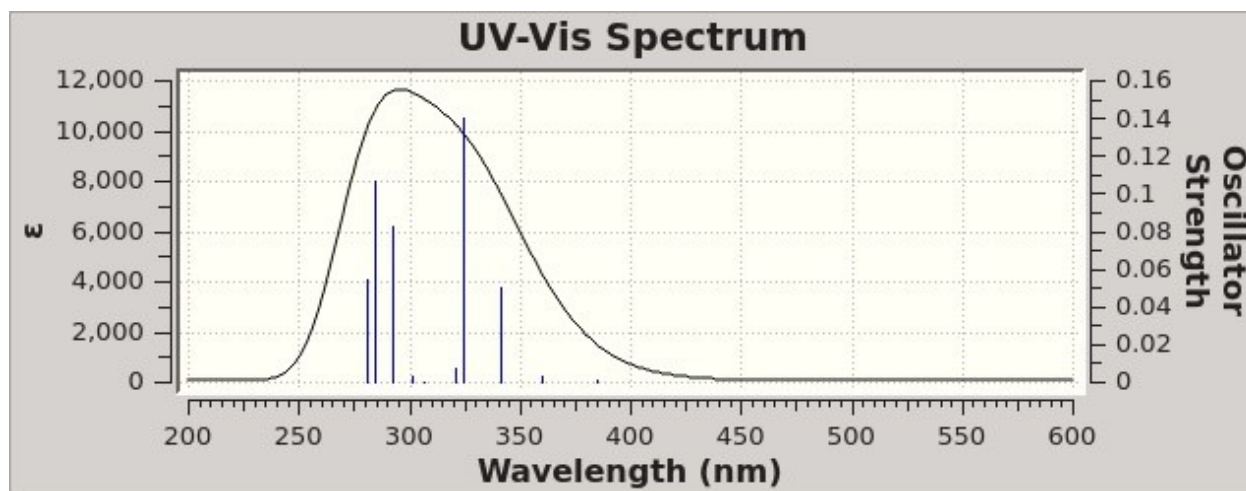

**Figure S18:** Calculated UV-Vis spectrum for probe **B** in water.



**Table S6:** Excitation energies and oscillator strengths listing for Probe B in water.

| Excited State | Nature | E (eV) | $\lambda_{max}$ (nm) | $f$    | Orbital transitions                                                        | Normalized coefficient                                           |
|---------------|--------|--------|----------------------|--------|----------------------------------------------------------------------------|------------------------------------------------------------------|
| 1:            | A      | 3.2177 | 385.31               | 0.0013 | 129 ->130                                                                  | 0.70508                                                          |
| 2:            | A      | 3.4458 | 359.81               | 0.0027 | 129 ->131                                                                  | 0.70176                                                          |
| 3:            | A      | 3.6361 | 340.98               | 0.0504 | 127 ->130<br>128 ->130                                                     | -0.30252<br>0.62516                                              |
| 4:            | A      | 3.8220 | 324.39               | 0.1403 | 129 ->132                                                                  | 0.69523                                                          |
| 5:            | A      | 3.8635 | 320.91               | 0.0071 | 127 ->130<br>128 ->130                                                     | 0.62649<br>0.31145                                               |
| 6:            | A      | 4.0385 | 307.01               | 0.0005 | 121 ->130<br>122 ->130                                                     | 0.54383<br>0.41795                                               |
| 7:            | A      | 4.1122 | 301.51               | 0.0035 | 127 ->131<br>128 ->131                                                     | 0.17461<br>0.67472                                               |
| 8:            | A      | 4.2395 | 292.45               | 0.0825 | 128 ->132<br>129 ->133                                                     | 0.18224<br>0.67119                                               |
| 9:            | A      | 4.3547 | 284.71               | 0.1063 | 127 ->131<br>127 ->132<br>128 ->132<br>129 ->133<br>129 ->134<br>129 ->135 | -0.18553<br>0.18025<br>0.53779<br>-0.18384<br>0.22249<br>0.13617 |
| 10:           | A      | 4.4141 | 280.88               | 0.0549 | 127 ->131<br>128 ->131<br>128 ->132<br>129 ->135                           | 0.64692<br>-0.16308<br>0.15380<br>0.10235                        |

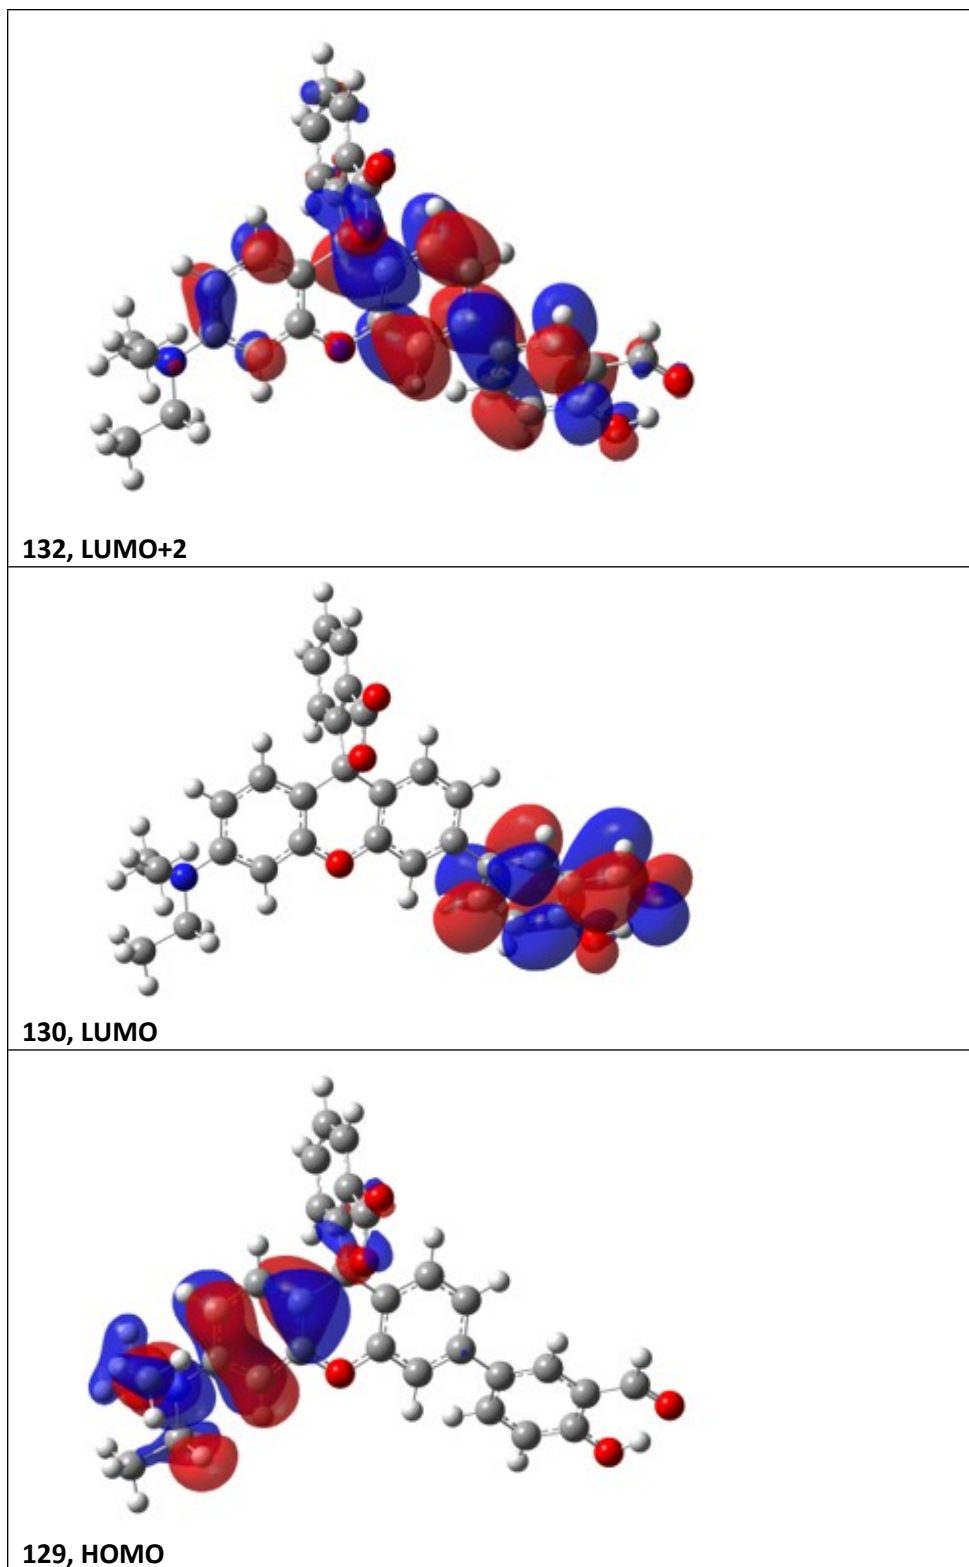

**Figure S19:** Drawings of selected molecular orbitals listed in Table S6.

Theoretical calculations for probe **BH<sup>+</sup>**.

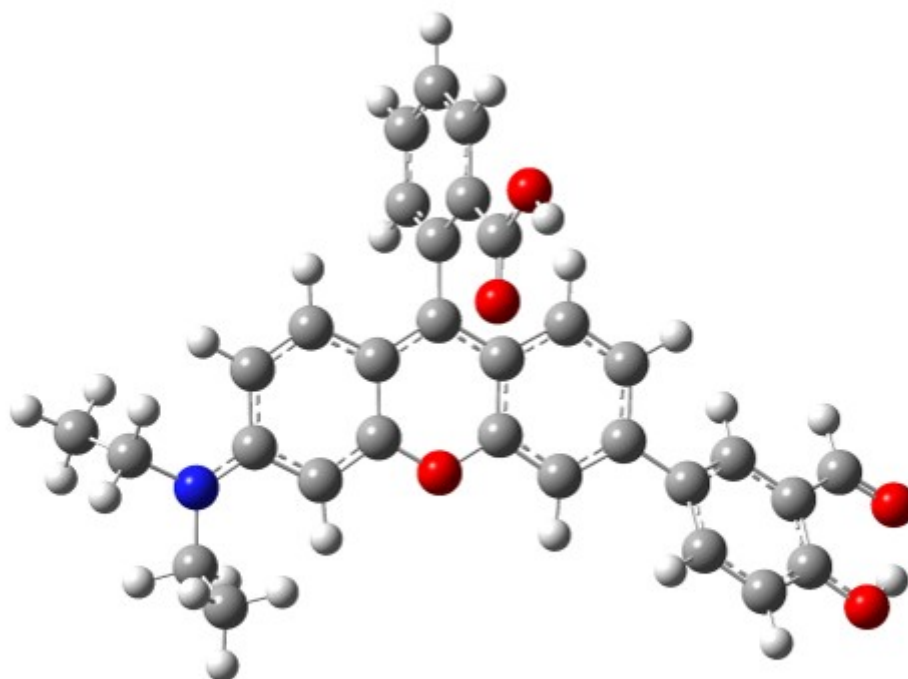

**Figure S20:** GaussView representation of probe **BH<sup>+</sup>**.

**Table S7:** Calculated atomic coordinates for Probe **BH<sup>+</sup>** in water.

Calculated atomic coordinates for Probe **BH<sup>+</sup>** in water.

| Row | Symbol | X        | Y        | Z        | Row | Symbol | X        | Y        | Z        |
|-----|--------|----------|----------|----------|-----|--------|----------|----------|----------|
| 1   | C      | 0.182047 | 0.754693 | -0.20208 | 12  | C      | -4.52219 | -0.40746 | -0.29323 |
| 2   | C      | 0.441353 | -0.62292 | -0.06845 | 13  | C      | -4.1693  | -1.80071 | -0.18313 |
| 3   | C      | 1.731365 | -1.12047 | 0.029321 | 14  | C      | -2.79461 | -2.13219 | -0.10633 |
| 4   | C      | 2.811901 | -0.24285 | -0.00072 | 15  | N      | -5.11694 | -2.74551 | -0.15683 |
| 5   | C      | 2.568529 | 1.142834 | -0.13862 | 16  | C      | -6.54639 | -2.43224 | -0.14553 |
| 6   | C      | 1.287679 | 1.628025 | -0.23825 | 17  | C      | -7.12193 | -2.292   | -1.54903 |
| 7   | C      | -1.17102 | 1.186486 | -0.27663 | 18  | C      | -4.58764 | -4.69779 | 1.281439 |
| 8   | C      | -2.18252 | 0.242178 | -0.26602 | 19  | C      | -4.7875  | -4.16983 | -0.13413 |
| 9   | C      | -1.84886 | -1.14229 | -0.14294 | 20  | C      | -1.47683 | 2.625018 | -0.45752 |
| 10  | O      | -0.56099 | -1.53173 | -0.04163 | 21  | C      | -1.71327 | 3.075114 | -1.75443 |
| 11  | C      | -3.57109 | 0.55807  | -0.33351 | 22  | C      | -1.97751 | 4.419578 | -1.99589 |

| Row | Symbol | X        | Y        | Z        | Row | Symbol | X        | Y        | Z        |
|-----|--------|----------|----------|----------|-----|--------|----------|----------|----------|
| 23  | C      | -2.00842 | 5.32547  | -0.94083 | 44  | H      | -6.71624 | -1.53394 | 0.449802 |
| 24  | C      | -1.77714 | 4.884361 | 0.355163 | 45  | H      | -7.03999 | -3.24556 | 0.391329 |
| 25  | C      | -1.51072 | 3.537108 | 0.609182 | 46  | H      | -8.19591 | -2.09637 | -1.49409 |
| 26  | C      | -1.28969 | 3.051195 | 1.992907 | 47  | H      | -6.65047 | -1.46836 | -2.09136 |
| 27  | O      | -1.14204 | 1.884981 | 2.287813 | 48  | H      | -6.97259 | -3.20839 | -2.12632 |
| 28  | O      | -1.27141 | 4.03868  | 2.896186 | 49  | H      | -4.36749 | -5.76797 | 1.252424 |
| 29  | C      | 4.187424 | -0.75127 | 0.108953 | 50  | H      | -3.75941 | -4.19091 | 1.782959 |
| 30  | C      | 5.229201 | -0.16508 | -0.59878 | 51  | H      | -5.48918 | -4.55243 | 1.882536 |
| 31  | C      | 6.536203 | -0.65373 | -0.50528 | 52  | H      | -5.61176 | -4.69232 | -0.62481 |
| 32  | C      | 6.817513 | -1.76033 | 0.33162  | 53  | H      | -3.9066  | -4.3431  | -0.75519 |
| 33  | C      | 5.774114 | -2.35022 | 1.050467 | 54  | H      | -1.68358 | 2.366763 | -2.57571 |
| 34  | C      | 4.490619 | -1.85372 | 0.933031 | 55  | H      | -2.15935 | 4.756037 | -3.01135 |
| 35  | O      | 8.050141 | -2.25455 | 0.454572 | 56  | H      | -2.21577 | 6.37395  | -1.12606 |
| 36  | C      | 7.598013 | -0.03241 | -1.27153 | 57  | H      | -1.80782 | 5.582443 | 1.183047 |
| 37  | O      | 8.767232 | -0.40731 | -1.23611 | 58  | H      | -1.13269 | 3.645218 | 3.769474 |
| 38  | H      | 1.871844 | -2.19285 | 0.101426 | 59  | H      | 5.039704 | 0.672745 | -1.26387 |
| 39  | H      | 3.403425 | 1.834463 | -0.13885 | 60  | H      | 5.991546 | -3.19017 | 1.701144 |
| 40  | H      | 1.111335 | 2.693677 | -0.3345  | 61  | H      | 3.699492 | -2.31433 | 1.516438 |
| 41  | H      | -3.86079 | 1.599042 | -0.4233  | 62  | H      | 8.638152 | -1.71342 | -0.123   |
| 42  | H      | -5.56198 | -0.11898 | -0.36165 | 63  | H      | 7.311982 | 0.819726 | -1.91086 |
| 43  | H      | -2.45674 | -3.15268 | 0.006135 |     |        |          |          |          |

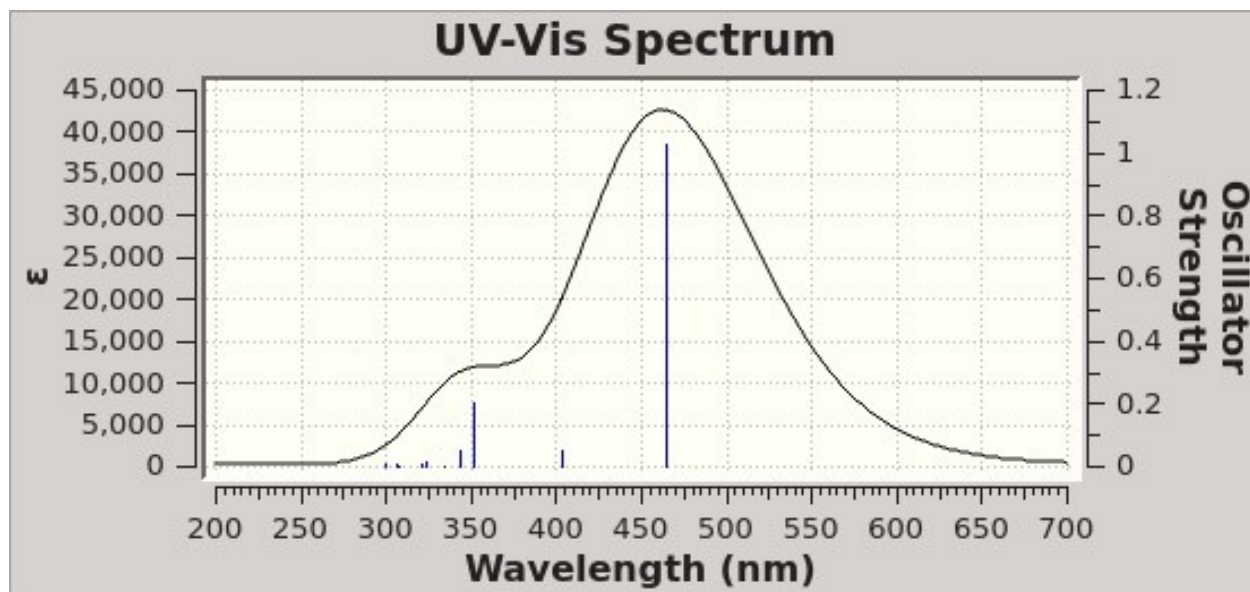

**Figure S21:** Calculated UV-Vis spectrum for probe  $\text{BH}^+$  in water.

**Table S8:** Excitation energies and oscillator strengths listing for Probe  $\text{BH}^+$  in water.

Excitation energies and oscillator strengths listing for Probe  $\text{BH}^+$  in water.

| Excited State | Nature | E (eV) | $\lambda$ (nm) | $f$    | Orbital transitions                              | Normalized coefficient                     |
|---------------|--------|--------|----------------|--------|--------------------------------------------------|--------------------------------------------|
| 1:            | A      | 2.6685 | 464.62         | 1.0257 | 129 ->130                                        | 0.69906                                    |
| 2:            | A      | 3.0722 | 403.57         | 0.0536 | 127 ->130<br>128 ->130                           | 0.21388<br>0.66851                         |
| 3:            | A      | 3.5223 | 352.00         | 0.2036 | 127 ->130<br>128 ->130<br>129 ->133              | 0.64723<br>-0.20214<br>-0.10511            |
| 4:            | A      | 3.6058 | 343.85         | 0.0496 | 128 ->131<br>129 ->131                           | -0.20402<br>0.65947                        |
| 5:            | A      | 3.7013 | 334.97         | 0.0001 | 125 ->130<br>126 ->130                           | 0.11965<br>0.68119                         |
| 6:            | A      | 3.8234 | 324.28         | 0.0124 | 129 ->132                                        | 0.69725                                    |
| 7:            | A      | 3.8649 | 320.79         | 0.0055 | 125 ->130<br>126 ->130                           | 0.69189<br>-0.12520                        |
| 8:            | A      | 4.0315 | 307.54         | 0.0016 | 123 ->131<br>128 ->131                           | 0.66219<br>0.17973                         |
| 9:            | A      | 4.0501 | 306.12         | 0.0088 | 123 ->131<br>124 ->130<br>128 ->131<br>129 ->131 | -0.19639<br>-0.23315<br>0.58134<br>0.22777 |
| 10:           | A      | 4.1449 | 299.12         | 0.0081 | 121 ->130<br>122 ->130<br>124 ->130              | 0.13193<br>0.64718<br>0.19670              |

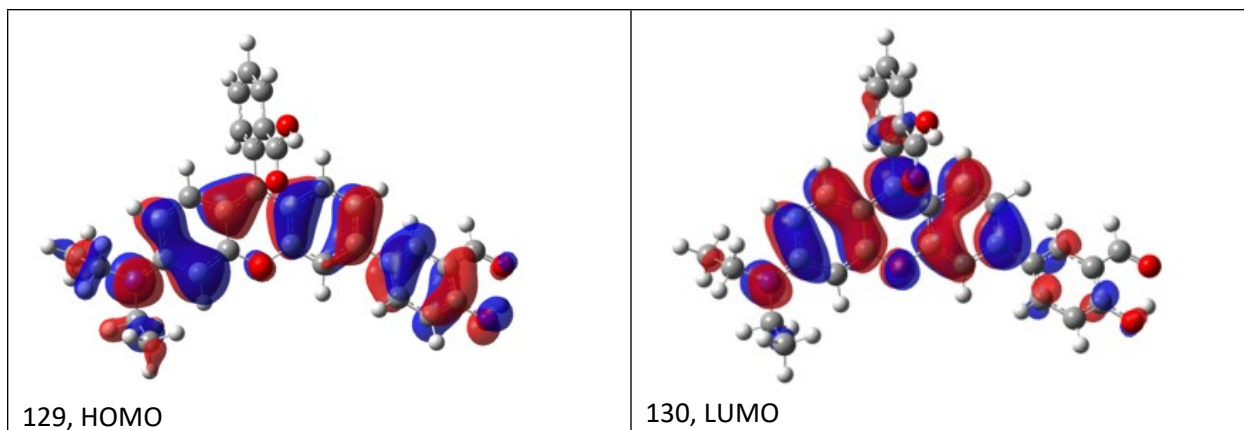

**Figure S22:** Drawings of selected molecular orbitals listed in Table S8.

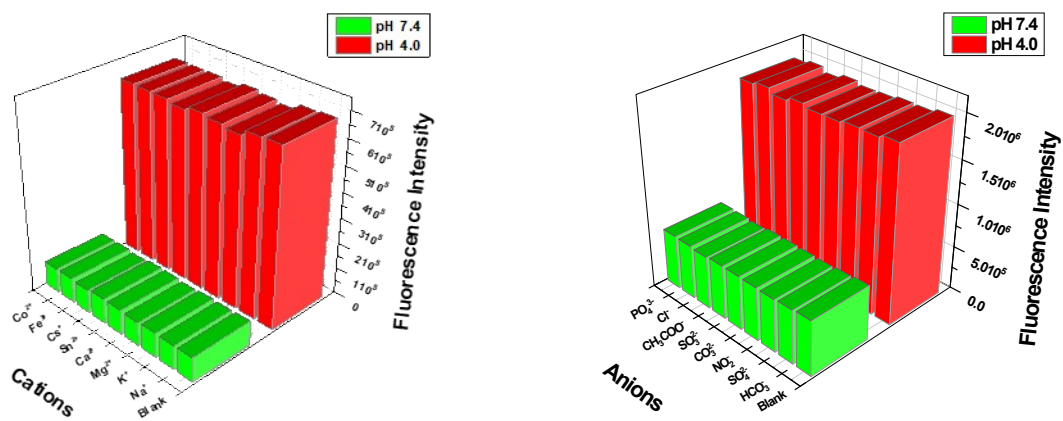

**Figure S23:** Emission intensities of probe **A** (10  $\mu$ M) in the absence and presence of different cations (50  $\mu$ M) and anions (50  $\mu$ M) in pH 4.0 and 7.4 buffers under excitation at 465 nm.

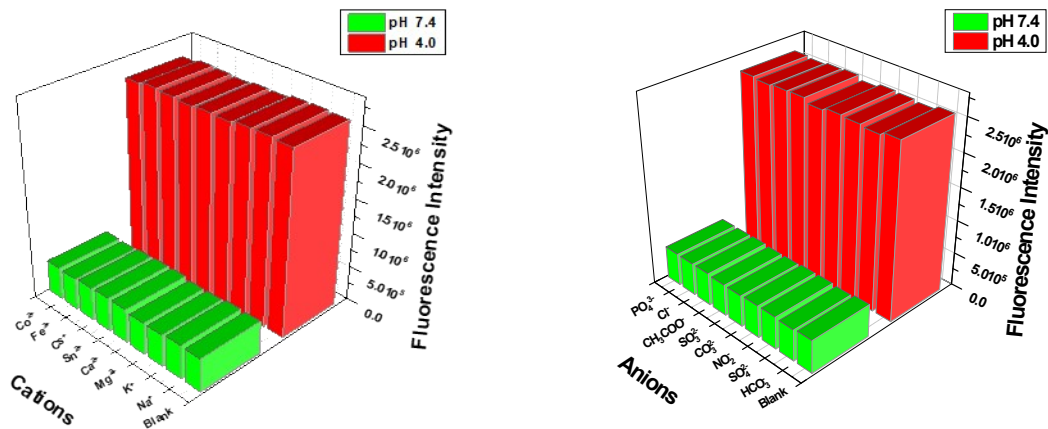

**Figure S24:** Emission intensities of probe **B** (10  $\mu$ M) in the absence and presence of different cations (50  $\mu$ M) and anions (50  $\mu$ M) in pH 4.0 and 7.4 buffers under excitation at 465 nm.

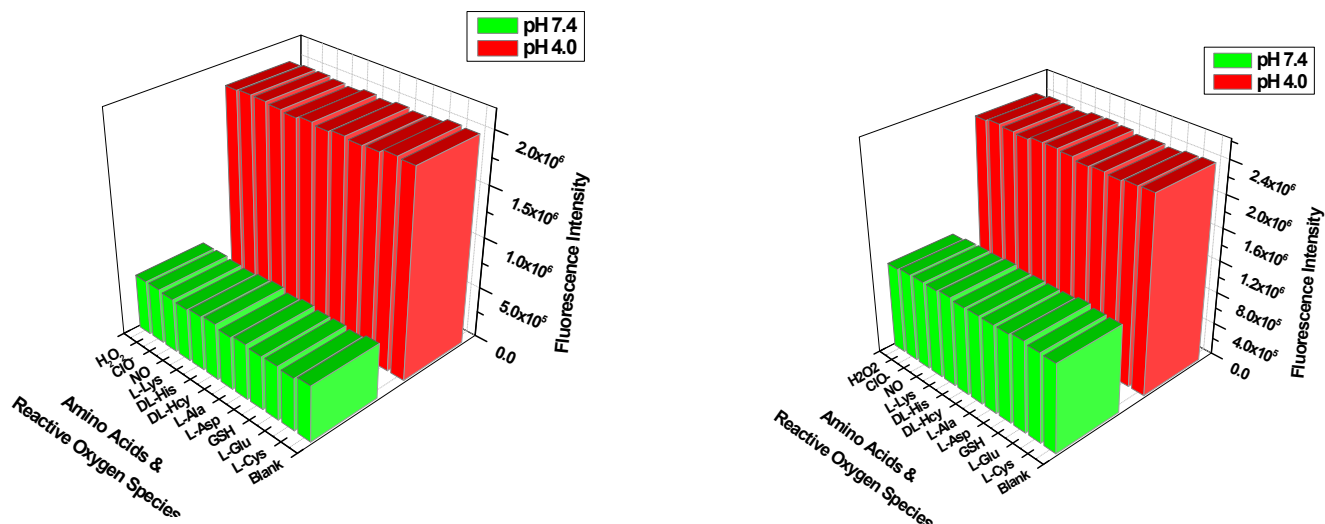

**Figure S25:** Emission intensities of 10  $\mu$ M probes **A** (left) and **B** (right) in the absence and presence of different amino acids and reactive oxygen and nitrogen species (50  $\mu$ M) in pH 4.0, and 7.4 buffers under excitation at 465 nm.

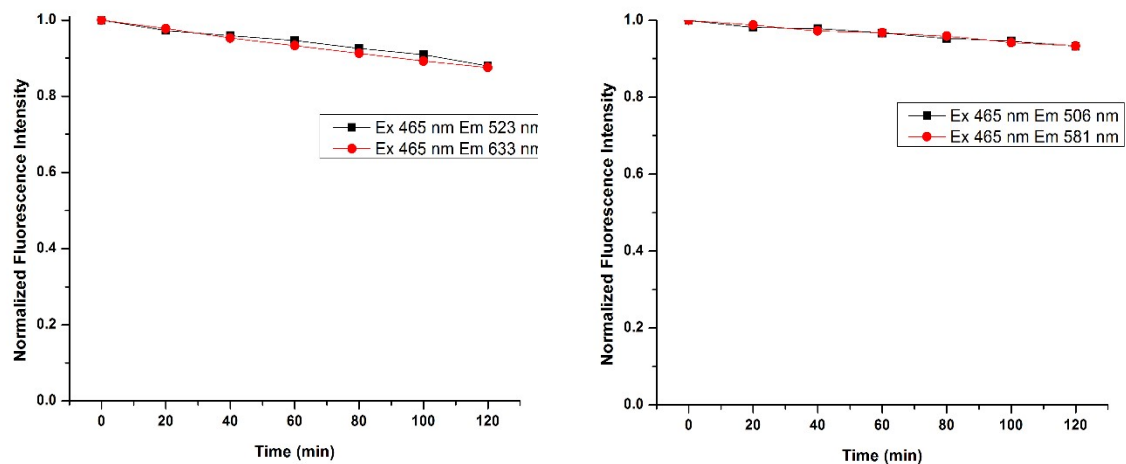

**Figure S26:** Photostability of 10  $\mu\text{M}$  probe **A** (Left) and probe **B** (right) in pH 7.4 buffer under excitation at 465 nm.

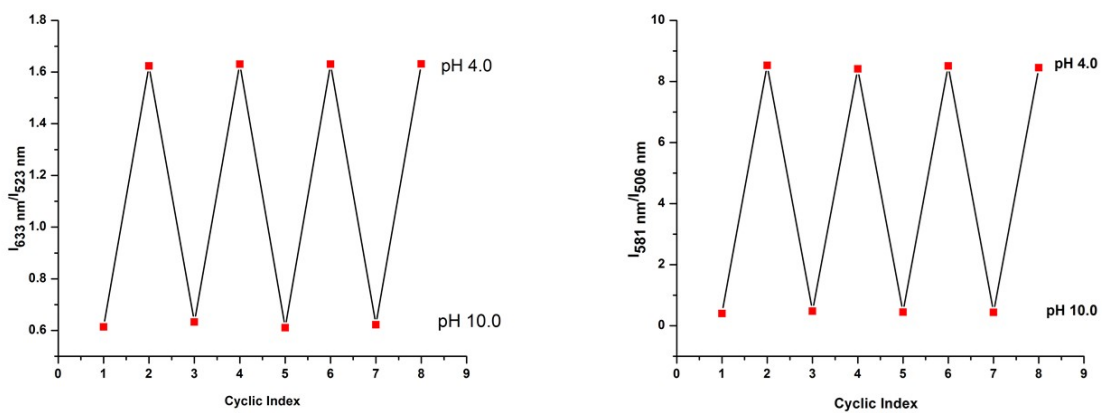

**Figure S27:** Fluorescence responses of 10  $\mu\text{M}$  probe **A** (left) and probe **B** (right) in 10 % EtOH under pH changes between 4.0 and 10.0 under excitation at 465 nm.



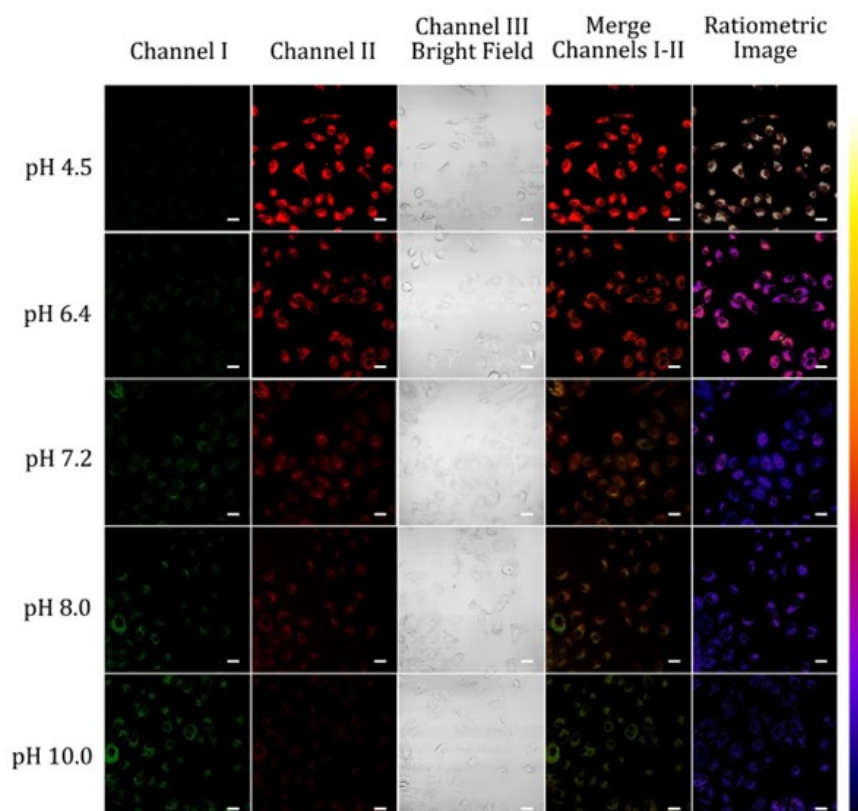

**Figure S28:** Fluorescence images of A549 cells incubated with 10  $\mu$ M of probe **B** in different pH buffers in the presence of 10  $\mu$ M nigericin. The green channel I was used to collect visible fluorescence of the probe from 500 nm to 550 nm while red channel II was utilized to collect red fluorescence from 575 nm to 650 nm of probe **B** at 488 nm excitation. Scale bars of all images above are at 50  $\mu$ m.

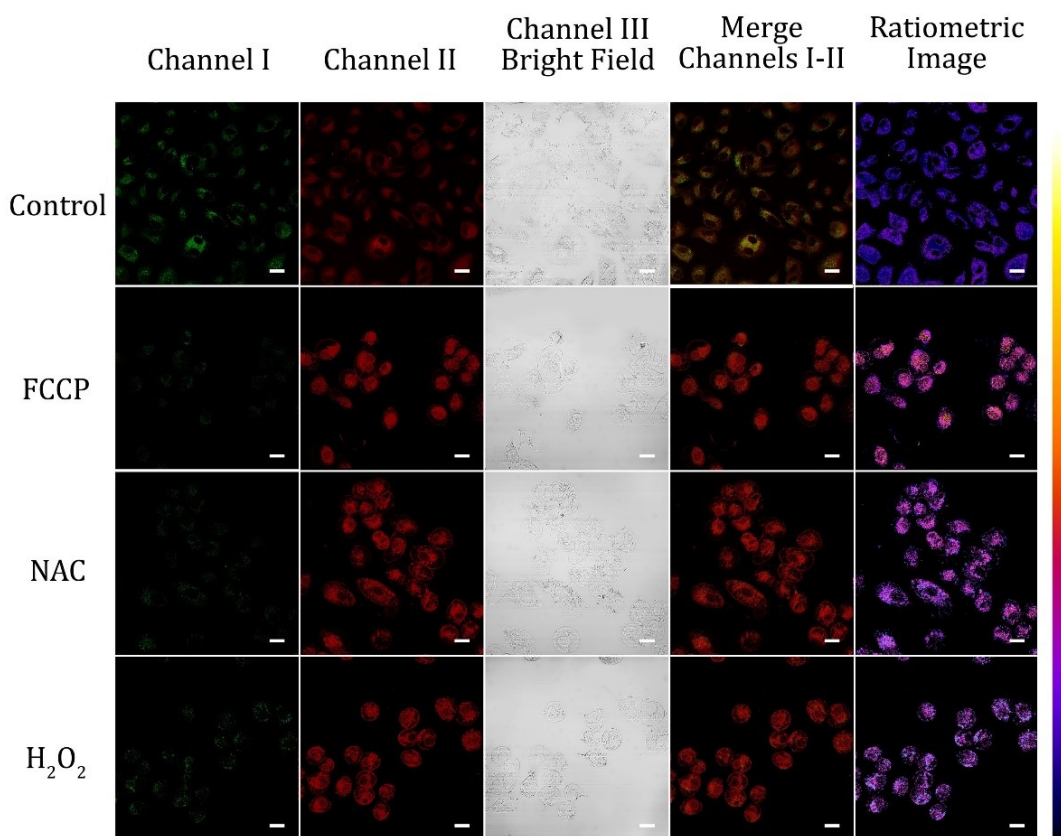

**Figure 29:** Fluorescence imaging of A549 cells incubated with 10  $\mu$ M of probes **B** in normal medium with 20-min treatment of FCCP (10  $\mu$ M), NAC (1 mM) or H<sub>2</sub>O<sub>2</sub> (500  $\mu$ M). The green channel I was used to collect visible fluorescence of probe **B** from 500 nm to 550 nm while red channel II was utilized to collect red fluorescence from 575 nm to 650 nm of probe **B** at 488 nm excitation. Scale bars of all images above are at 50  $\mu$ m.

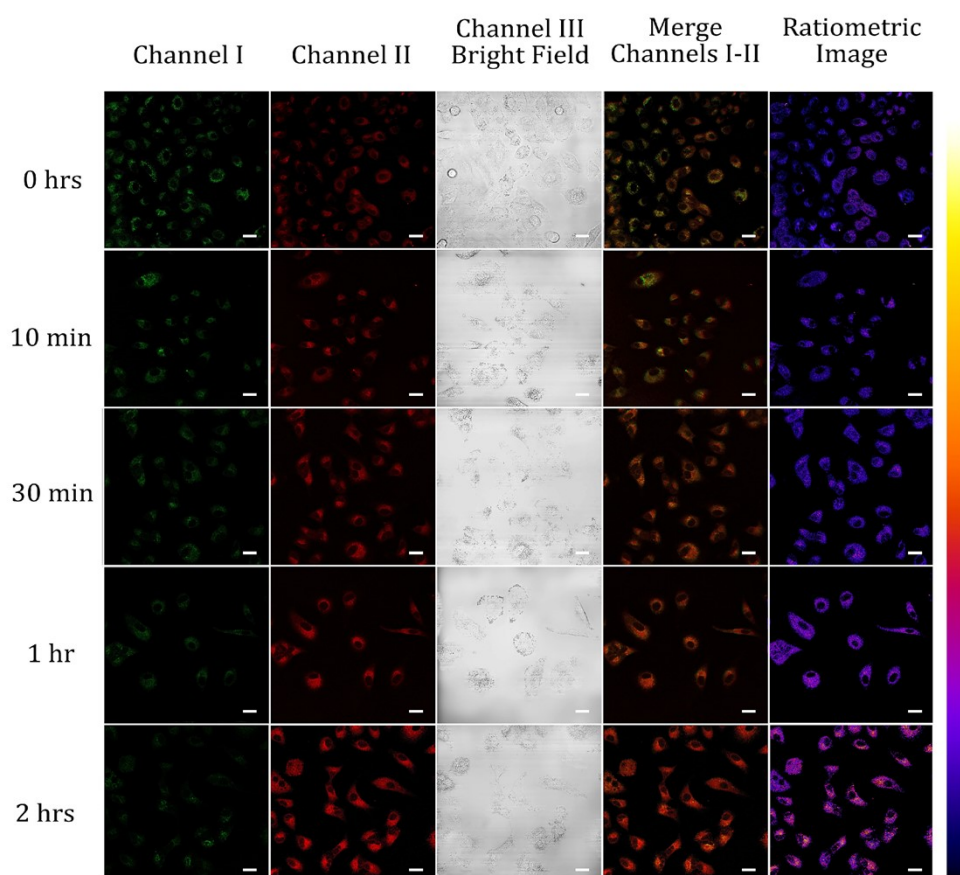

**Figure 30:** Fluorescence imaging of A549 cells incubated with 10  $\mu\text{M}$  of probe **B** in serum-free medium for different times. The green channel I was used to collect the probe visible fluorescence of from 500 nm to 550 nm while red channel II was utilized to collect the probe fluorescence from 575 nm to 650 nm at 488 nm excitation. Scale bars of all images above are at 50  $\mu\text{m}$ .

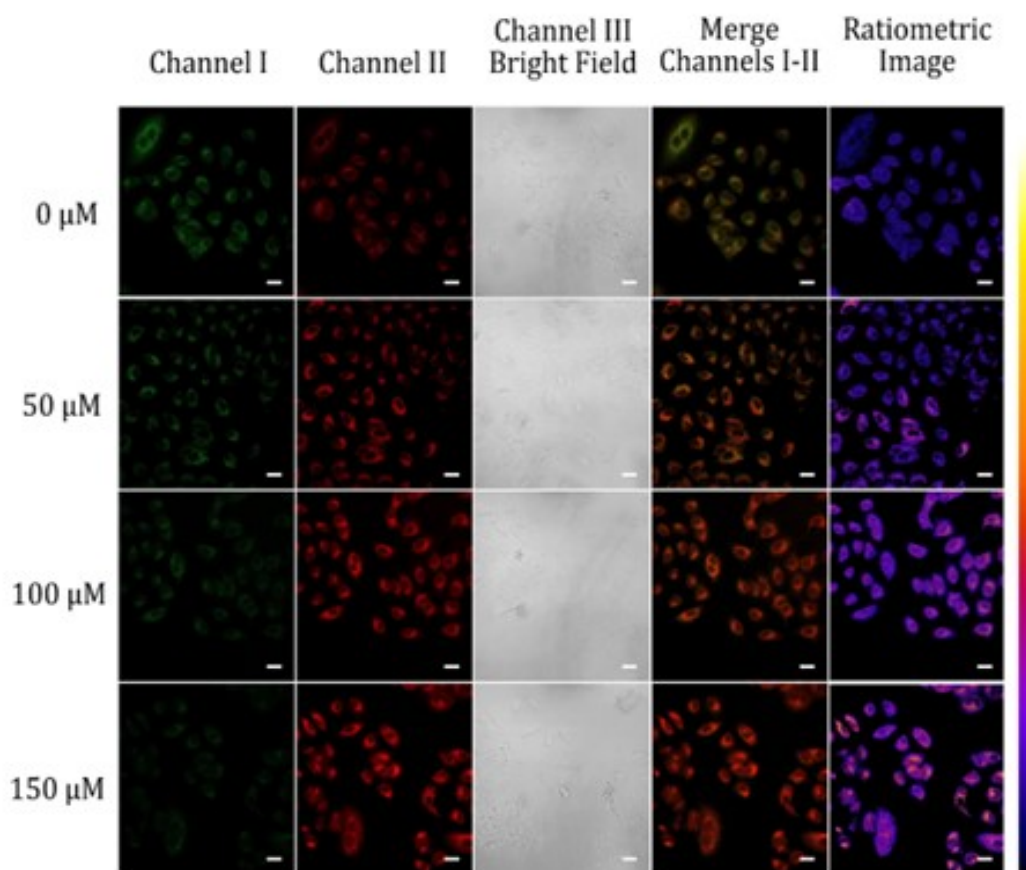

**Figure 31.** Confocal fluorescence microscopy images of A549 cells grown with 10  $\mu\text{M}$  probe **B** under different hypoxia conditions in the absence and presence of 50, 100, 150  $\mu\text{M}$   $\text{CoCl}_2$ . The green channel I was used to collect the probe visible fluorescence from 500 nm to 550 nm while red channel II was utilized to the probe red fluorescence from 575 nm to 650 nm at 488 nm excitation. Scale bars of all images above are at 50  $\mu\text{m}$ .

## References:

- [1] S. Wan, S. Xia, J. Medford, E. Durocher, T.E. Steenwinkel, L. Rule, Y. Zhang, R.L. Luck, T. Werner, H. Liu, *J. Mater. Chem. B*, 9 (2021) 5150-5161.
- [2] M.J. Frisch, G.W. Trucks, H.B. Schlegel, G.E. Scuseria, M.A. Robb, J.R. Cheeseman, G. Scalmani, V. Barone, G.A. Petersson, H. Nakatsuji, X. Li, M. Caricato, A.V. Marenich, J. Bloino, B.G. Janesko, R. Gomperts, B. Mennucci, H.P. Hratchian, J.V. Ortiz, A.F. Izmaylov, J.L. Sonnenberg, D. Williams-Young, F. Ding, F. Lipparini, F. Egidi, J. Goings, B. Peng, A. Petrone, T. Henderson, D. Ranasinghe, V.G. Zakrzewski, J. Gao, N. Rega, G. Zheng, W. Liang, M. Hada, M. Ehara, K. Toyota, R. Fukuda, J. Hasegawa, M. Ishida, T. Nakajima, Y. Honda, O. Kitao, H. Nakai, T. Vreven, K. Throssell, J.A. Montgomery, Jr, J.E. Peralta, F. Ogliaro, M.J. Bearpark, J.J. Heyd, E.N. Brothers, K.N. Kudin, V.N. Staroverov, T.A. Keith, R. Kobayashi, J. Normand, K. Raghavachari, A.P. Rendell, J.C. Burant, S.S. Iyengar, J. Tomasi, M. Cossi, J.M. Millam, M. Klene, C. Adamo, R. Cammi, J.W. Ochterski, R.L. Martin, K. Morokuma, O. Farkas, J.B. Foresman, D.J. Fox, Gaussian, Inc., Wallingford CT, 2016.
- [3] A. Austin, G.A. Petersson, M.J. Frisch, F.J. Dobek, G. Scalmani, K. Throssell, *Journal of Chemical Theory and Computation*, 8 (2012) 4989-5007.
- [4] G. Scalmani, M.J. Frisch, *The Journal of Chemical Physics*, 132 (2010) 114110.
- [5] R. Dennington, T.A. Keith, J.M. Millam, GaussView, Version 6.0.16. Semichem Inc., Shawnee Mission, KS., GaussView, Version 6.0.16. Semichem Inc. 2016.
